# Supplementary material for: Diastereoselective reversible C–C bond exchange of oxindole–thiazolidienediones for dynamic combinatorial chemistry
Source: Royal Society of Chemistry journal article supplement (doi:10.1039/d2ob01993k), 2022-01-01

# Diastereoselective Reversible C-C Bond Exchange of Oxindole-Thiazolidinediones for Dynamic Combinatorial Chemistry

Ananta Gorai, Gargi Chakraborti, Soumya Jyoti Basak and Jyotirmayee Dash\*

School of Chemical Sciences, Indian Association for the Cultivation of Science, Jadavpur, Kolkata-700032, India, E-mail: [ocjd@iacs.res.in](mailto:ocjd@iacs.res.in).

## Table of contents

|                                                                  |     |
|------------------------------------------------------------------|-----|
| 1.0 General Information                                          | S2  |
| 2.0 Synthesis of oxindolyl-thiazolidinediones                    | S3  |
| 3.0 Solvent optimization for reversible exchange reaction        | S8  |
| 4.0 Optimization of exchange reaction condition in aqueous media | S8  |
| 5.0 Reversible exchange reaction at optimised condition          | S9  |
| 6.0 Synthesis of bi-indolinedione derivatives (GP-4)             | S10 |
| 7.0 Potential Dynamic Combinatorial Library                      | S12 |
| 8.0 HPLC data                                                    | S12 |
| 9.0 Crystal data                                                 | S23 |
| 10.0 NMR and mass spectra                                        | S30 |

## **1.0 General information**

All experiments were carried out in flame-dried reaction vials. Solvents were dried using standard procedures. All starting materials were obtained from commercial suppliers and used as received. Products were purified by flash chromatography on silica gel (100-200 mesh, Merck). Unless otherwise stated, yields refer to analytical pure samples. NMR spectra were recorded in CDCl<sub>3</sub> and DMSO-d<sub>6</sub>. **<sup>1</sup>H NMR** spectra were recorded at 500 MHz using Brüker AVANCE 500 MHz and JEOL 400 MHz instruments at 278 K. Signals are quoted as  $\delta$  values in ppm using residual protonated solvent signals as internal standard (CDCl<sub>3</sub>:  $\delta$  7.26 ppm). Data is reported as follows: chemical shift, multiplicity (s = singlet, d = doublet, t = triplet, q = quartet, m = multiplet, br = broad), coupling constants (Hz) and integration. **<sup>13</sup>C NMR** spectra were recorded on either a JEOL-400 (100 MHz), or a Brüker AVANCE 500 MHz (125 MHz) with complete proton decoupling. Chemical shifts ( $\delta$ ) are reported in ppm downfield from tetramethylsilane with the solvent as the internal reference (CDCl<sub>3</sub>:  $\delta$  77.26 ppm). **HRMS** analyses were performed with Q-TOF YA263 high resolution (Water Corporation) instruments by +ve mode electrospray ionization.

## 2.0 Synthesis of oxindolyl-thiazolidinediones **2**

**General procedure for the aldol reaction (GP-1)**<sup>19</sup>: To a solution of thiazolidinedione **3** (1.0 equiv) in water was added isatin **1** (1.0 equiv) and stirred at room temperature until the complete consumption of the starting materials. The completion of the reaction was checked by TLC. The reaction mixture was filtered and dried under vacuum to afford the oxindolyl-thiazolidinediones **2** as solid residue in high yields and purity. Compound **2aa** was purified by flash chromatography using ethyl acetate–hexane (Table S1).

**Table S1.** Synthesis of oxindolyl-thiazolidinedione conjugates via on-water aldol reactions.

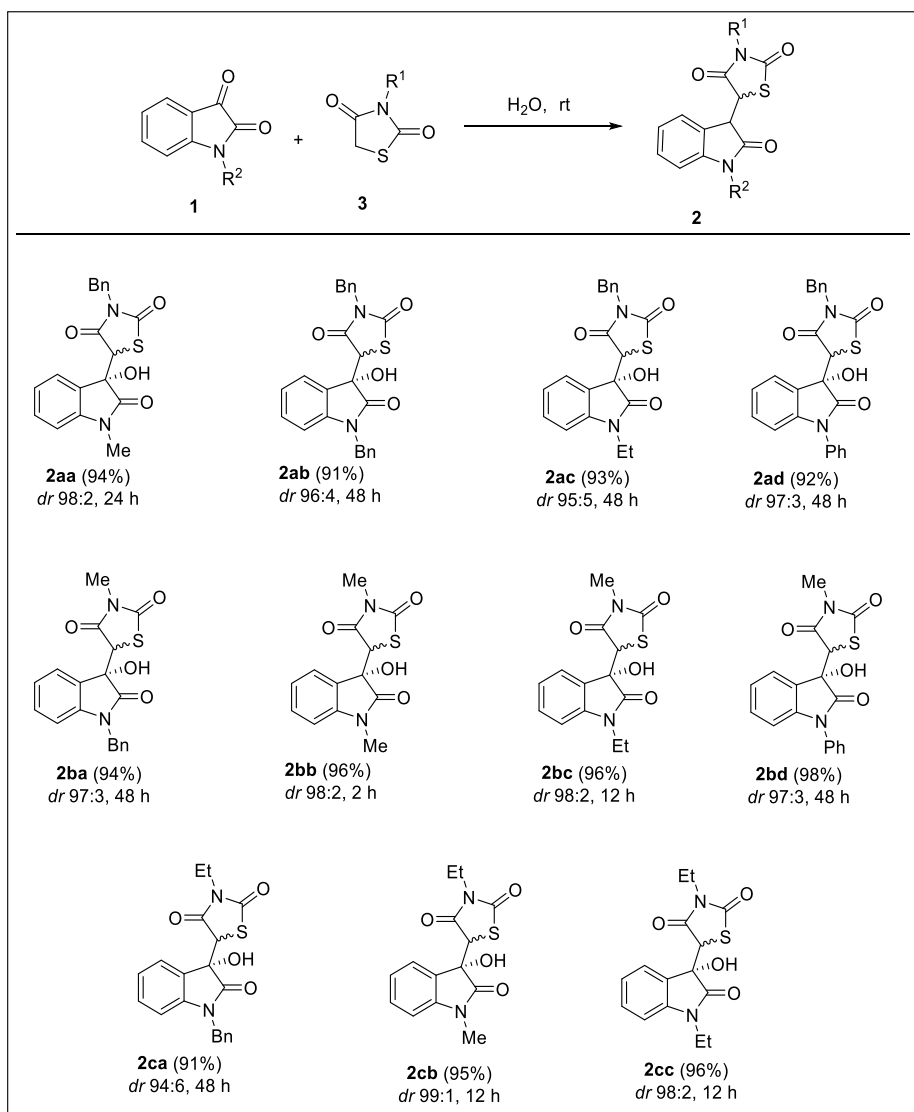

### 3-Benzyl-5-(3-hydroxy-1-methyl-2-oxoindolin-3-yl)thiazolidine-2,4-dione (**2aa**)<sup>19</sup>

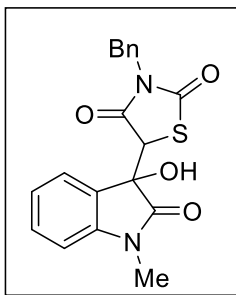

Using the general procedure (**GP-1**), methyl protected isatin **1b** (77.76 mg, 0.48 mmol) and benzyl protected thiazolidinedione **3b** (100 mg, 0.48 mmol) were stirred in water for 24 h. After the completion of the reaction, the crude mixture was extracted with ethyl acetate (3 × 15 mL), dried over anhydrous Na<sub>2</sub>SO<sub>4</sub>, filtered, and concentrated in vacuo. The residue was then purified by flash chromatography with ethyl acetate–hexane (5/95 to 20/80) to afford **2aa** (166.9 mg, 94%) as a viscous liquid. NMR of major diastereomer: <sup>1</sup>H NMR (500 MHz, DMSO-d<sub>6</sub>) δ 7.58 (d, *J* = 7.4 Hz, 1H), 7.46 (t, *J* = 7.8 Hz, 1H), 7.15 (t, *J* = 7.4 Hz, 1H), 7.13 (s, 1H), 7.10 (t, *J* = 6.7 Hz, 2H), 7.05 – 6.99 (m, 2H), 6.50 (d, *J* = 7.3 Hz, 2H), 5.26 (s, 1H), 4.45 (m, 2H), 3.15 (s, 3H). <sup>13</sup>C NMR (125 MHz, DMSO-d<sub>6</sub>) δ 174.5, 170.9, 169.9, 144.1, 134.8, 130.7, 128.3, 127.1, 126.2, 124.3, 122.4, 108.9, 74.2, 57.9, 43.9, 26.2. HRMS (ESI) calculated for C<sub>19</sub>H<sub>16</sub>N<sub>2</sub>KO<sub>4</sub>S [M+K]<sup>+</sup> 407.0462, found 407.0459.

### 3-Benzyl-5-(1-benzyl-3-hydroxy-2-oxoindolin-3-yl)thiazolidine-2,4-dione (**2ab**)

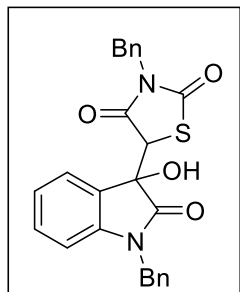

Using the general procedure (**GP-1**), benzyl protected isatin **2a** (100 mg, 0.4214 mmol) and benzyl protected thiazolidinedione **3b** (87.35 mg, 0.4214 mmol) were stirred for 48 h in water to afford compound **2ab** (170.3 mg, 91%) as an off-white solid. NMR of *anti* diastereomer: <sup>1</sup>H NMR (500 MHz, CDCl<sub>3</sub>) δ 7.56 (d, *J* = 7.4 Hz, 1H), 7.41 (d, *J* = 4.2 Hz, 4H), 7.37 (dd, *J* = 10.4, 5.8 Hz, 2H), 7.32 (d, *J* = 6.3 Hz, 4H), 7.28 (s, 2H), 7.07 (t, *J* = 7.5 Hz, 1H), 6.77 (d, *J* = 7.9 Hz, 1H), 5.07 (d, *J* = 15.7 Hz, 1H), 4.97 (s, 1H), 4.90 (d, *J* = 15.7 Hz, 1H), 4.80 (d, *J* = 14.2 Hz, 2H). <sup>13</sup>C NMR (125 MHz, CDCl<sub>3</sub>) δ 174.5, 171.9, 169.9, 143.7, 135.1, 134.7, 131.4, 129.0, 128.8, 128.2, 128.0, 127.7, 124.5, 123.7, 110.3, 60.7, 45.9, 44.6. HRMS (ESI) calculated for C<sub>25</sub>H<sub>20</sub>N<sub>2</sub>NaO<sub>4</sub>S [M+Na]<sup>+</sup> is 467.1041, found 467.1042.

### 3-Benzyl-5-(1-ethyl-3-hydroxy-2-oxoindolin-3-yl)thiazolidine-2,4-dione (**2ac**)

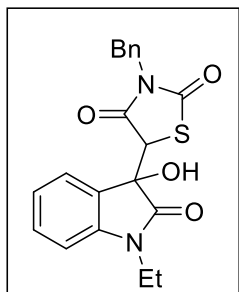

Using the general procedure (**GP-1**), ethyl protected isatin **1d** (100 mg, 0.57 mmol) and benzyl protected thiazolidinedione **3b** (118 mg, 0.57 mmol) were stirred in water for 12 hours to afford **2ac** (202.8 mg, 93%) as an orange solid. NMR of major diastereomer:  $^1\text{H}$  NMR (400 MHz,  $\text{CDCl}_3$ )  $\delta$  7.48 (d,  $J = 7.4$  Hz, 1H), 7.36 (t,  $J = 7.8$  Hz, 1H), 7.26 – 7.21 (m, 3H), 7.15 (d,  $J = 3.9$  Hz, 2H), 7.01 (t,  $J = 7.6$  Hz, 1H), 6.85 (d,  $J = 7.9$  Hz, 1H), 4.83 (s, 1H), 4.73 – 4.62 (m, 2H), 3.83 (dd,  $J = 14.2, 7.2$  Hz, 1H), 3.69 (dt,  $J = 14.2, 7.2$  Hz, 1H), 1.29 (t,  $J = 7.2$  Hz, 3H).  $^{13}\text{C}$  NMR (100 MHz,  $\text{CDCl}_3$ )  $\delta$  173.8, 171.7, 170.1, 143.5, 134.7, 131.5, 128.7, 128.2, 126.1, 124.7, 123.5, 109.3, 54.5, 45.6, 35.3, 12.5. HRMS (ESI) calculated for  $\text{C}_{20}\text{H}_{19}\text{N}_2\text{O}_4\text{S}$   $[\text{M}+\text{H}]^+$  is 383.1066, found 383.1066.

### 3-Benzyl-5-(3-hydroxy-2-oxo-1-phenylindolin-3-yl)-thiazolidine-2,4-dione (**2ad**)<sup>19</sup>

Using the general procedure (**GP-1**), phenyl protected isatin **1c** (37.9 mg, 0.17 mmol, 1.0 equiv) and benzyl protected thiazolidinedione **3b** (35.2 mg, 0.17 mmol, 1.0 equiv)

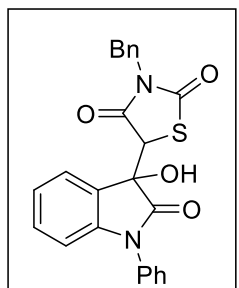

were stirred for 48 h in water to afford **2ad** (67.3 mg, 92%) as a colorless solid. NMR of major diastereomer:  $^1\text{H}$  NMR (500 MHz,  $\text{DMSO-d}_6$ ) 7.68 (d, 1H,  $J = 8.9$  Hz), 7.63 (t, 2H,  $J = 9.6$  Hz), 7.51 (t, 1H,  $J = 9.4$  Hz), 7.45–7.43 (m, 2H), 7.40–7.38 (m, 1H), 7.14 (d, 1H,  $J = 9.1$  Hz), 7.10–7.04 (m, 3H), 6.73 (d, 1H,  $J = 9.9$  Hz), 6.50 (d, 2H,  $J = 9.1$  Hz), 5.38 (s, 1H), 4.72–4.35 (m, 2H);  $^{13}\text{C}$  NMR (125 MHz,  $\text{DMSO-d}_6$ ) 174.2, 170.9, 170.3, 143.8, 134.8, 134.0, 130.9, 129.8, 128.4, 128.3, 127.1, 126.2, 125.9, 124.9, 123.1, 109.3, 74.3, 58.3, 44.0. HRMS (ESI) calculated for  $\text{C}_{24}\text{H}_{19}\text{N}_2\text{O}_4\text{S}$   $[\text{M}+\text{H}]^+$  431.1060, found 431.1063.

### 5-(1-Benzyl-3-hydroxy-2-oxoindolin-3-yl)-3-methylthiazolidine-2,4-dione (**2ba**)

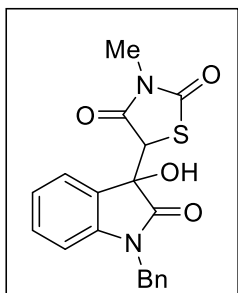

Using the general procedure (**GP-1**), benzyl protected isatin **1a** (147.13 mg, 0.62 mmol) and methyl protected thiazolidinedione **3d** (81.3 mg, 0.62 mmol) were stirred in water for 48 hours to afford **2ba** (214.5 mg, 94%) as an orange solid. NMR of major diastereomer:  $^1\text{H}$  NMR (400 MHz,  $\text{CDCl}_3$ )  $\delta$  7.49 (d,  $J = 7.4$  Hz, 1H), 7.37 (t,  $J = 7.8$  Hz, 1H), 7.24 (dd,  $J = 4.8, 1.3$  Hz, 3H), 7.13 (s, 2H), 7.03 (t,  $J = 7.6$  Hz, 1H), 6.84 (d,  $J = 7.8$  Hz, 1H),

4.86 (s, 1H), 4.72 – 4.60 (m, 2H), 3.22 (s, 3H).  $^{13}\text{C}$  NMR (100 MHz,  $\text{CDCl}_3$ )  $\delta$  174.4, 135.0, 131.5, 129.0, 128.0, 127.5, 124.4, 123.8, 110.3, 53.3, 44.4, 37.5. HRMS (ESI) calculated for  $\text{C}_{19}\text{H}_{17}\text{N}_2\text{O}_4\text{S}$   $[\text{M}+\text{H}]^+$  is 369.0909, found 369.0974.

### 5-(3-Hydroxy-1-methyl-2-oxoindolin-3-yl)-3-methylthiazolidine-2,4-dione (**2bb**)<sup>19</sup>

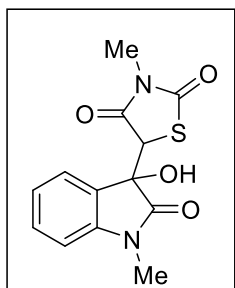

Using the general procedure (**GP-1**), methyl protected isatin **1b** (77.7 mg, 0.4825 mmol) and methyl protected thiazolidinedione **3d** (63.28 mg, 0.4825 mmol) were stirred in water for 12 h. The residue was isolated by filtration to afford **2bb** (137.9 mg, 96%) as a light orange solid. NMR of *anti*-diastereomer:  $^1\text{H}$  NMR (500 MHz,  $\text{DMSO-d}_6$ )  $\delta$  7.54 (d,  $J = 7.9$  Hz, 1H), 7.36 (t,  $J = 7.8$  Hz, 1H), 7.07 (s, 1H), 7.02 (t,  $J = 7.4$  Hz, 2H), 5.15 (s, 1H), 3.15 (s, 3H), 2.64 (s, 3H).  $^{13}\text{C}$  NMR (125 MHz,  $\text{DMSO-d}_6$ )  $\delta$  174.4, 171.1, 170.1, 143.9, 130.6, 126.5, 123.9, 122.4, 108.9, 74.1, 57.3, 27.1, 26.2. HRMS (ESI) calculated for  $\text{C}_{13}\text{H}_{12}\text{N}_2\text{NaO}_4\text{S}$   $[\text{M}+\text{Na}]^+$  is 315.0415, found 315.0417.

### 5-(1-Ethyl-3-hydroxy-2-oxoindolin-3-yl)-3-methylthiazolidine-2,4-dione (**2bc**)<sup>19</sup>

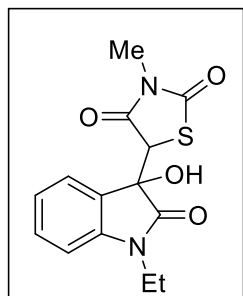

Using the general procedure (**GP-1**), ethyl protected isatin **1d** (146.98 mg, 0.839 mmol) and methyl protected thiazolidinedione **3d** (110 mg, 0.839 mmol) were stirred in water for 12 h to afford **2bc** (248.5 mg, 96%) as a white solid. NMR of major diastereomer:  $^1\text{H}$  NMR (500 MHz,  $\text{DMSO-d}_6$ )  $\delta$  7.54 (d,  $J = 7.4$  Hz, 1H), 7.35 (t,  $J = 7.8$  Hz, 1H), 7.05 (d,  $J = 7.1$  Hz, 2H), 7.00 (t,  $J = 7.5$  Hz, 1H), 5.15 (s, 1H), 3.78 – 3.64 (m, 2H), 2.65 (s, 3H), 1.19 (t,  $J = 7.1$  Hz, 3H).  $^{13}\text{C}$  NMR (125 MHz,  $\text{DMSO-d}_6$ )  $\delta$  174.0, 171.1, 170.0, 143.1, 130.6, 126.7, 124.1, 122.2, 108.9, 74.0, 57.3, 34.3, 27.2, 12.0. HRMS (ESI) calculated for  $\text{C}_{14}\text{H}_{15}\text{N}_2\text{O}_4\text{S}$   $[\text{M}+\text{H}]^+$  is 307.0747, found 307.0749.

### 5-(3-Hydroxy-2-oxo-1-phenylindolin-3-yl)-3-methylthiazolidine-2,4-dione (**2bd**)<sup>19</sup>

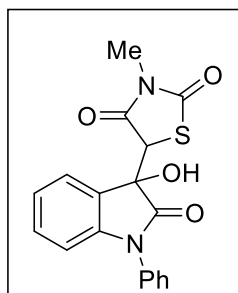

Using the general procedure (**GP-1**), phenyl protected isatin **1c** (138.2 mg, 0.62 mmol) and methyl protected thiazolidinedione **3d** (81.3 mg, 0.62 mmol) were stirred in water for 48 h to afford **2bd** (210.8 mg, 98%) as a white solid.

NMR of major diastereomer:  $^1\text{H}$  NMR (500 MHz, DMSO- $d_6$ )  $\delta$  7.66 – 7.61 (m, 3H), 7.50 (t,  $J$  = 7.5 Hz, 1H), 7.46 (d,  $J$  = 8.5 Hz, 2H), 7.32 (m, 2H), 7.08 (t,  $J$  = 7.8 Hz, 1H), 6.70 (d,  $J$  = 7.9 Hz, 2H), 5.28 (s, 1H), 2.69 (s, 3H).  $^{13}\text{C}$  NMR (125 MHz, DMSO- $d_6$ )  $\delta$  174.1, 171.1, 170.4, 143.8, 134.0, 130.7, 129.8, 128.4, 126.6, 126.2, 124.5, 123.0, 109.3, 74.1, 57.8, 27.3. HRMS (ESI) calcd for  $\text{C}_{18}\text{H}_{15}\text{N}_2\text{O}_4\text{S}$   $[\text{M}+\text{H}]^+$  355.0747, found 355.0745.

### 5-(1-Benzyl-3-hydroxy-2-oxoindolin-3-yl)-3-ethylthiazolidine-2,4-dione (**2ca**)<sup>19</sup>

Using the general procedure (**GP-1**), benzyl protected isatin **1a** (147 mg, 0.62 mmol) and ethyl

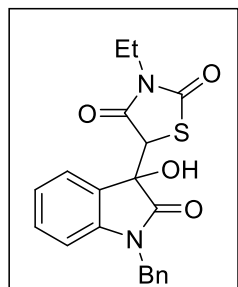

protected thiazolidinedione **3a** (90 mg, 0.62 mmol) and were stirred in water for 48 h to provide **2ca** (215.6 mg, 91%) as a light brown solid. NMR of major diastereomer:  $^1\text{H}$  NMR (500 MHz, DMSO- $d_6$ )  $\delta$  7.57 (d,  $J$  = 7.5 Hz, 1H), 7.44 (d,  $J$  = 7.8 Hz, 2H), 7.34 (t,  $J$  = 7.6 Hz, 2H), 7.27 (m, 2H), 7.24 (s, 1H), 6.99 (t,  $J$  = 7.6 Hz, 1H), 6.82 (d,  $J$  = 7.9 Hz, 1H), 5.19 (s, 1H), 4.99 – 4.95 (m, 2H), 3.24 (tt, 2H,  $J$  = 6.8, 13.6 Hz, 2H), 0.51 (t,  $J$  = 7.1 Hz, 1H).

$^{13}\text{C}$  NMR (125 MHz, DMSO- $d_6$ )  $\delta$  174.7, 170.9, 169.8, 143.2, 135.9, 130.4, 128.5, 127.4, 127.3, 126.5, 124.0, 122.4, 109.5, 74.4, 57.2, 43.2, 35.8, 11.8. HRMS (ESI) calculated for  $\text{C}_{20}\text{H}_{18}\text{N}_2\text{NaO}_4\text{S}$   $[\text{M}+\text{Na}]^+$  is 405.0885, found 405.0886.

### 3-Ethyl-5-(3-hydroxy-1-methyl-2-oxoindolin-3-yl)-thiazolidine-2,4-dione (**2cb**)<sup>19</sup>

Using the general procedure (**GP-1**), methyl protected isatin **1b** (100 mg, 0.62 mmol) and ethyl

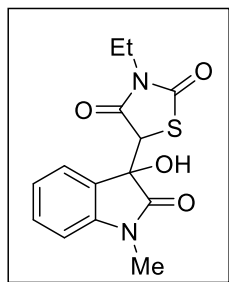

protected thiazolidinedione **3a** (90 mg, 0.62 mmol) were stirred in water for 12 h to afford **2cb** (180.3 mg, 95%) as a white solid. NMR of major diastereomer:  $^1\text{H}$  NMR (500 MHz, DMSO- $d_6$ )  $\delta$  7.55 (d,  $J$  = 8.5 Hz, 1H), 7.36 (t,  $J$  = 8.3 Hz, 1H), 7.08 (s, 1H), 7.03 – 7.01 (m, 2H), 5.08 (s, 1H), 3.29 – 3.15 (m, 2H), 3.14 (s, 3H), 0.47 (d,  $J$  = 7.1 Hz, 3H).  $^{13}\text{C}$  NMR (125 MHz, DMSO- $d_6$ )  $\delta$  174.4, 171.0, 169.7, 144.0, 130.6, 126.2, 123.9, 122.3, 108.8,

74.4, 57.5, 35.8, 26.2, 11.8. HRMS (ESI) calcd for  $\text{C}_{14}\text{H}_{14}\text{KN}_2\text{O}_4\text{S}$   $[\text{M}+\text{K}]^+$  345.0306, found 345.0327.

### 3-Ethyl-5-(1-ethyl-3-hydroxy-2-oxoindolin-3-yl)thiazolidine-2,4-dione (**2cc**)<sup>19</sup>

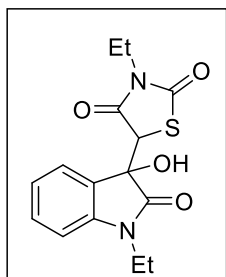

Using the general procedure (**GP-1**), ethyl protected isatin **1d** (107.6 mg, 0.62 mmol) and ethyl protected thiazolidinedione **3a** (90 mg, 0.62 mmol) were stirred in water for 12 h to afford **2cc** (190.3 mg, 96%) as a white solid. NMR of major diastereomer:  $^1\text{H}$  NMR (500 MHz, DMSO- $d_6$ )  $\delta$  7.54 (d,  $J$  = 8.3 Hz, 1H), 7.35 (t,  $J$  = 7.2 Hz, 1H), 7.07 (s, 1H), 7.05 (d,  $J$  = 7.8 Hz, 1H), 6.99 (t,  $J$  = 7.2 Hz, 1H), 5.08 (s, 1H), 3.64 – 3.76 (m, 2H), 3.19 – 3.16 (m, 2H), 1.19 (t,  $J$  = 7.2 Hz, 3H), 0.47 (t,  $J$  = 7.1 Hz, 3H).  $^{13}\text{C}$  NMR (125 MHz, DMSO- $d_6$ )  $\delta$  174.0, 171.0, 169.6, 143.0, 130.5, 126.4, 124.1, 122.1, 108.9, 74.2, 57.4, 35.8, 34.3, 12.0, 11.7. HRMS (ESI) calcd for  $\text{C}_{15}\text{H}_{20}\text{N}_2\text{O}_4\text{S}$   $[\text{M}+\text{NH}_4]^+$  338.1169, found 338.1185.

### **3.0 Solvent optimization for reversible exchange reaction**

**Table S2: Solvent optimization for reversible exchange reaction**

| entry | Solvent                 | temp.<br>( $^{\circ}\text{C}$ ) | time<br>(h) | Conversion ( <b>2aa:2ab</b> ) <sup>a</sup> |
|-------|-------------------------|---------------------------------|-------------|--------------------------------------------|
| 1     | H <sub>2</sub> O (pH=7) | 25                              | 12          | 87:13                                      |
| 2     | 50% i-PrOH              | 25                              | 12          | 34:66                                      |
| 3     | 20% i-PrOH              | 25                              | 12          | 51:49                                      |
| 4     | 10% i-PrOH              | 25                              | 12          | 54:46                                      |
| 5     | 5% i-PrOH               | 25                              | 24          | 15:85                                      |
| 6     | 20% t-BuOH              | 25                              | 12          | 67:33                                      |
| 7     | 10% EtOH                | 25                              | 36          | 56:44                                      |
| 8     | 3% DMSO                 | 25                              | 12          | 100:0                                      |

### **4.0 Optimization of exchange reaction condition in aqueous media**

A solution of oxindolyl-thiazolidinedione isatin **1a** (50 mg, 0.21 mmol, 1 equiv) and **2aa** ( $dr$  = 98:2, 77.36 mg, 0.21 mmol, 1 equiv) in a mixture of acetate buffer at pH 4 (5 mL, 0.1 M) was



stirred at room temperature for 48 h. The pH was raised to 8 by adding a saturated solution of NaHCO<sub>3</sub> and the reaction mixture was extracted with ethyl acetate (3 × 10 mL). The combined organic layers were dried over Na<sub>2</sub>SO<sub>4</sub>, followed by filtered and concentrated. The residue was purified by column chromatography (20:80 EtOAc-Hexane) followed by analysis (Table 1). The distribution ratio at equilibrium was determined by HPLC.

For the reverse reaction, a solution of oxindolyl-thiazolidinedione methyl protected isatin **1b** (34 mg, 0.21 mmol, 1 equiv) and **2ab** (*dr* = 96:4, 93.34 mg, 0.21 mmol, 1 equiv) in a mixture of acetate buffer at pH 6 (5 mL, 0.1 M) was stirred at room temperature for 48 h (Table 2). Equilibrium distribution ratio was analyzed by HPLC.

## **5.0 Reversible exchange reactions at optimised condition**

### **5.1 General procedure for the oxindolyl-thiazolidinedione and isatin library exchange (GP-2)**

A solution of isatin **1R<sup>3</sup>** (0.21 mmol, 1 equiv) and oxindolyl-thiazolidinedione **2R<sup>1</sup>R<sup>2</sup>** (0.21 mmol, 1 equiv) in acetate buffer of pH 6 (5 mL, 0.1 M) was stirred at room temperature for 24 h (Scheme 3). After 24 h, the crude mixture was extracted with ethyl acetate (3 × 10 mL). Equilibrium distribution ratio was analyzed by HPLC.

### **5.2 Exchange between oxindolyl-thiazolidinedione and thiazolidinedione (GP-3)**

A solution of oxindolyl-thiazolidinedione **2aa** (*dr* = 98:2, 84.6 mg, 0.23 mmol, 1 equiv), *N*-ethyl thiazolidinedione **3a** (33.4 mg, 0.23 mmol, 1 equiv) in acetate buffer of pH 6 (5 mL, 0.1 M) was stirred at room temperature for 24 h (Scheme 4a). After 24 h, the crude mixture was extracted with ethyl acetate (3 × 10 mL). Equilibrium distribution ratio was analyzed by HPLC.

### **5.3 Procedure for the cross-exchange reaction**

A mixture of oxindolyl-thiazolidinedione **2aa** (*dr* = 98:2, 50 mg, 0.136 mmol, 1 equiv), oxindolyl-thiazolidinedione **2bb** (*dr* = 98:2, 50 mg, 0.136 mmol, 1 equiv) in acetate buffer solution (25 mL, 0.1 M) adjusted to pH 6 was stirred at room temperature for 24 h (Scheme 4b). Then, the reaction mixture was extracted with ethyl acetate (3 × 15 mL). The equilibrium distribution ratio of crude mixture was calculated using HPLC.

## 5.4 Exchange between oxindolyl-thiazolidinedione and aromatic aldehydes

A mixture of oxindolyl-thiazolidinedione **2aa** (*dr* = 98:2, 50 mg, 0.136 mmol, 1 equiv), aromatic aldehydes **6** (1 equiv) in acetate buffer solution (25 mL, 0.1 M) adjusted to pH 6 was stirred at room temperature for 24 h (Scheme 4c). Then, the reaction mixture was extracted with ethyl acetate (3 × 15 mL). The residue was purified by chromatography (30% EtOAc-Hexane) and analyzed by <sup>1</sup>H NMR.

## 6.0 Synthesis of bi-indolinedione derivatives (GP-4)

A mixture of isatin derivative **1** (1.0 equiv) and oxindole derivative **6** (1.0 equiv) was stirred on isopropanol (2 mL) in 10 mol% Et<sub>3</sub>N at room temperature for 30 min. Petroleum ether was added to the crude mixture to obtain the 3-hydroxybiindolinedione derivatives **7** (Scheme S1). The crude product was purified by washing the solid with petroleum ether–isopropyl alcohol (1:1) (3 × 2 mL) and characterized by <sup>1</sup>H and <sup>13</sup>C NMR.

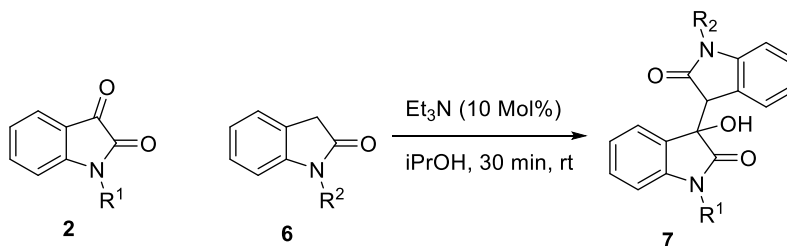

**Scheme S1.** Synthesis of 3-hydroxybiindolinedione derivatives.

### 3-Hydroxy-1,1'-dimethyl-[3,3'-biindoline]-2,2'-dione (**7aa**)

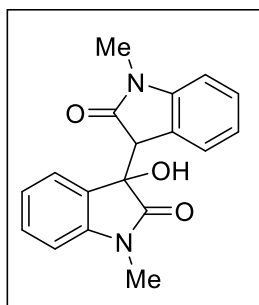

Using the general procedure (**GP-2**), a mixture of methyl protected isatin **1b** (100 mg, 0.62 mmol) and methyl protected oxindole **6a** (91.2 mg, 0.62 mmol) afforded compound **7aa** (*dr* = 98:2, 130 mg, 68%) as an off-white solid. NMR of *anti* diastereomer: <sup>1</sup>H NMR (400 MHz, CDCl<sub>3</sub>) δ 7.43 (dd, *J* = 16.1, 7.8 Hz, 2H), 7.21 (dd, *J* = 15.2, 7.6 Hz, 2H), 6.83 – 6.77 (m, 2H), 6.74 (t, *J* = 7.6 Hz, 1H), 6.04 (d, *J* = 10.6 Hz, 2H), 3.95 (s,

1H), 3.25 (s, 3H), 2.89 (s, 3H). <sup>13</sup>C NMR (100 MHz, CDCl<sub>3</sub>) δ 175.8, 175.0, 145.1, 130.9, 129.2, 128.0, 124.6, 124.2, 123.6, 123.0, 122.5, 108.7, 49.8, 26.5, 25.9. HRMS (ESI) calculated for C<sub>18</sub>H<sub>16</sub>N<sub>2</sub>NaO<sub>3</sub> [M+Na]<sup>+</sup> is 331.1059, found 331.1059.

### 1'-Benzyl-3-hydroxy-1-methyl-[3,3'-biindoline]-2,2'-dione (7da)

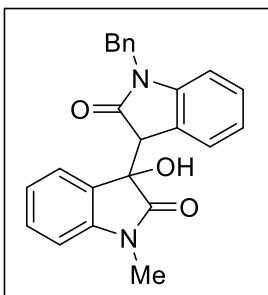

Using the general procedure (GP-2), a mixture of methyl protected isatin **1b** (100 mg, 0.62 mmol) and benzyl protected oxindole **6d** (138.4 mg, 0.62 mmol) provided compound **7da** (*dr* = 95:5, 147.9 mg, 62%) as an off-white solid. NMR of major diastereomer: <sup>1</sup>H NMR (400 MHz, CDCl<sub>3</sub>) δ 7.41 (t, *J* = 7.6 Hz, 1H), 7.31 (d, *J* = 7.5 Hz, 1H), 7.27 (s, 1H), 7.25 – 7.21 (m, 3H), 7.15 (d, *J* = 8.0 Hz, 2H), 7.10 (dd, *J* = 10.4, 7.7 Hz, 2H), 6.83 – 6.77 (m, 2H), 6.63 (q, *J* = 7.6 Hz, 1H), 6.43 (d, *J* = 5.8 Hz, 1H), 4.98 (d, *J* = 12.6 Hz, 1H), 4.81 (d, *J* = 12.4 Hz, 1H), 4.12 (s, 1H), 3.01 (s, 3H). <sup>13</sup>C NMR (100 MHz, CDCl<sub>3</sub>) δ 175.1, 175.0, 144.4, 144.0, 135.2, 130.6, 128.9, 128.7, 127.5, 127.4, 127.2, 124.6, 124.3, 123.2, 123.2, 122.4, 109.5, 108.5, 50.3, 43.9, 26.0. HRMS (ESI) calculated for C<sub>24</sub>H<sub>20</sub>N<sub>2</sub>NaO<sub>3</sub> [M+Na]<sup>+</sup> is 407.4170, found 407.4138.

### 1,1'-Diethyl-3-hydroxy-[3,3'-biindoline]-2,2'-dione (7bb)

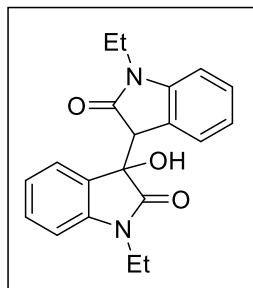

Using the general procedure (GP-2), a mixture of ethyl protected isatin **1d** (108.6 mg, 0.62 mmol) and ethyl protected oxindole **6b** (100 mg, 0.62 mmol) provided compound **7bb** (*dr* = 96:4, 133.5 mg, 64%) as a black solid. NMR of major diastereomer: <sup>1</sup>H NMR (400 MHz, CDCl<sub>3</sub>) δ 7.51 (d, *J* = 7.4 Hz, 1H), 7.34 (t, *J* = 7.8 Hz, 1H), 7.22 (d, *J* = 6.1 Hz, 3H), 7.09 (s, 2H), 6.99 (t, *J* = 7.5 Hz, 1H), 6.84 (d, *J* = 7.9 Hz, 1H), 4.87 (s, 1H), 4.69 – 4.58 (m, 2H), 3.83 (dd, *J* = 14.2, 7.2 Hz, 1H), 3.67 (dd, *J* = 14.2, 7.1 Hz, 1H), 1.30 – 1.25 (m, 6H). <sup>13</sup>C NMR (100 MHz, CDCl<sub>3</sub>) δ 174.1, 170.4, 143.4, 134.7, 131.4, 128.6, 124.8, 123.6, 109.2, 45.4, 35.3, 12.4. HRMS (ESI) calculated for C<sub>20</sub>H<sub>20</sub>N<sub>2</sub>NaO<sub>3</sub> [M+Na]<sup>+</sup> is 359.1372, found 359.1374.

## 6.1 Exchange between oxindole and oxindolyl-thiazolidinedione (GP-5)

A mixture of oxindolyl-thiazolidinedione **2** (0.23 mmol, 1 equiv) and *N*-substituted oxindole **6** (0.23 mmol, 1 equiv) in acetate buffer of pH 6 (25 mL, 0.1 M) was stirred at room temperature for 24 h (Scheme 5). After 24 h, reaction mixture was extracted with ethyl acetate (3 × 10 mL) and the equilibrium distribution ratio of crude mixture was calculated using HPLC.

### 7.0 Potential Dynamic Combinatorial Library

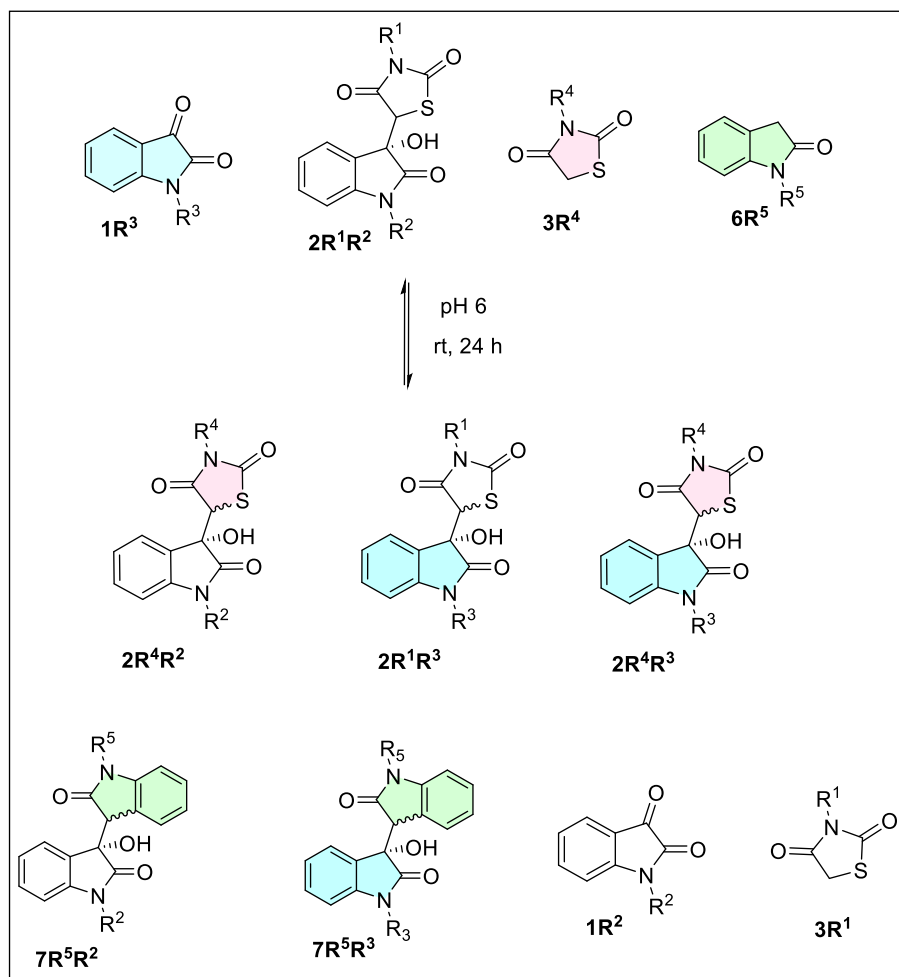

**Scheme S2.** Potential Dynamic Combinatorial Library.

### 8.0 HPLC data:

The Compounds are identified by running pure compounds in HPLC using CHIRALCEL OD column (0.46cm ID × 25 cm) using an isocratic system isopropanol/*n*-Hexanes (10:90), wavelength ( $\lambda$ ) = 200 nm.

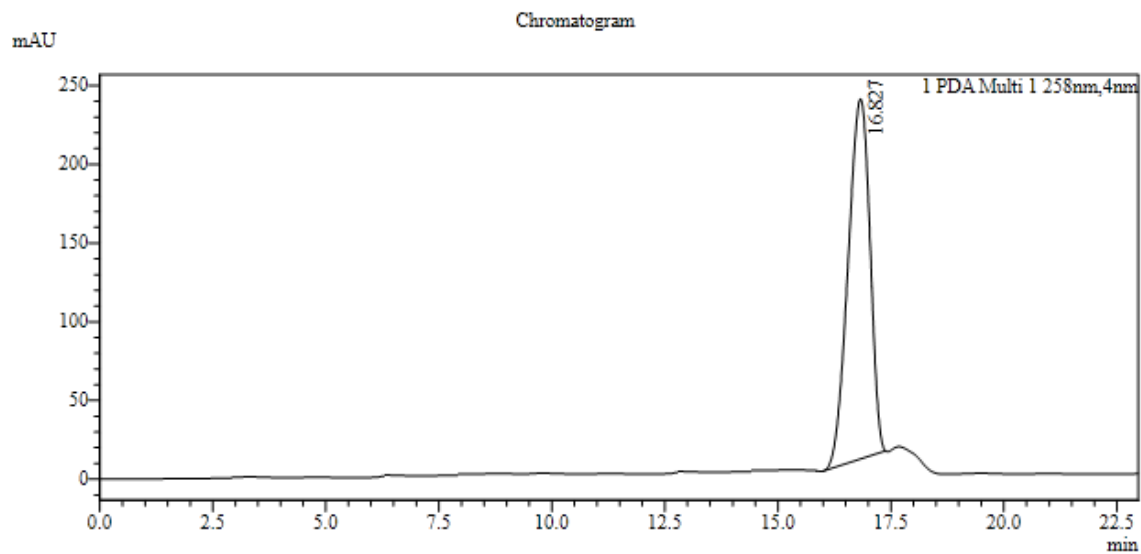

**Figure S1.** HPLC of compound **2aa**

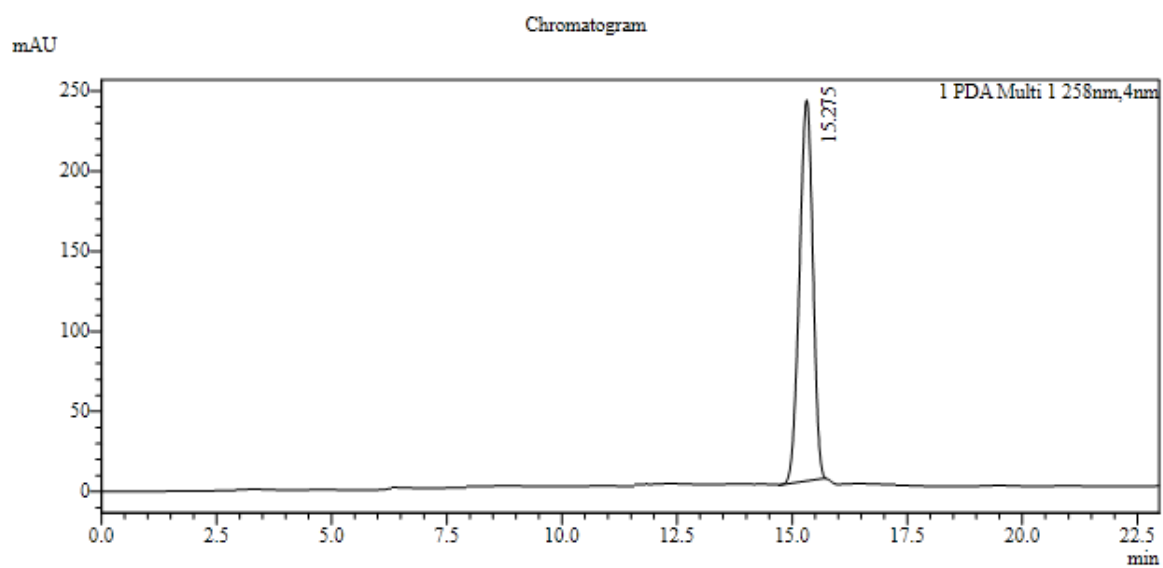

**Figure S2.** HPLC of compound **2ab**

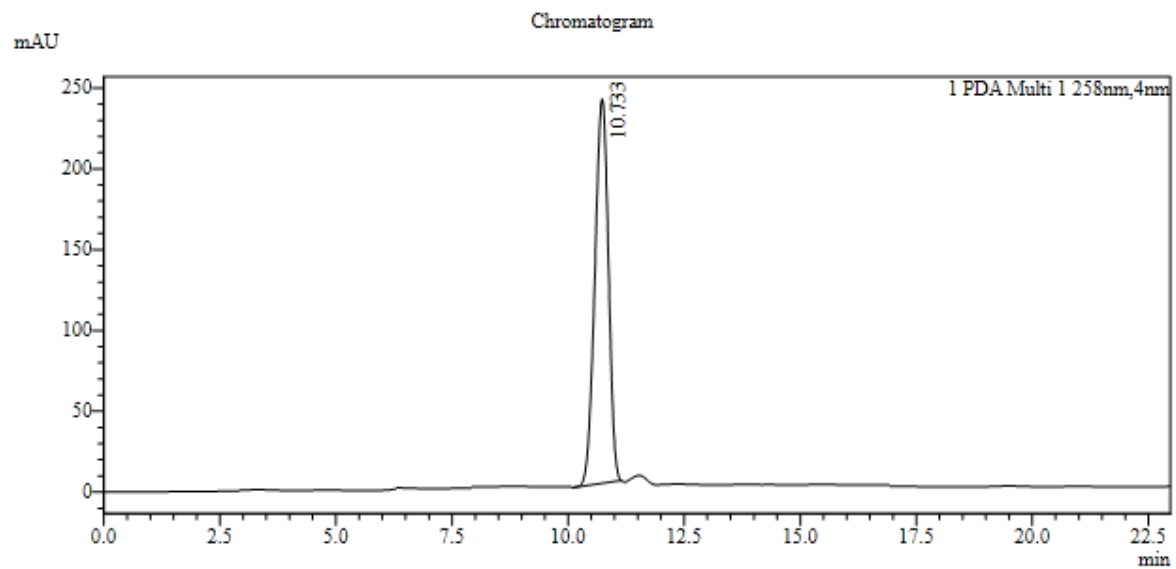

**Figure S3.** HPLC of compound **2ba**

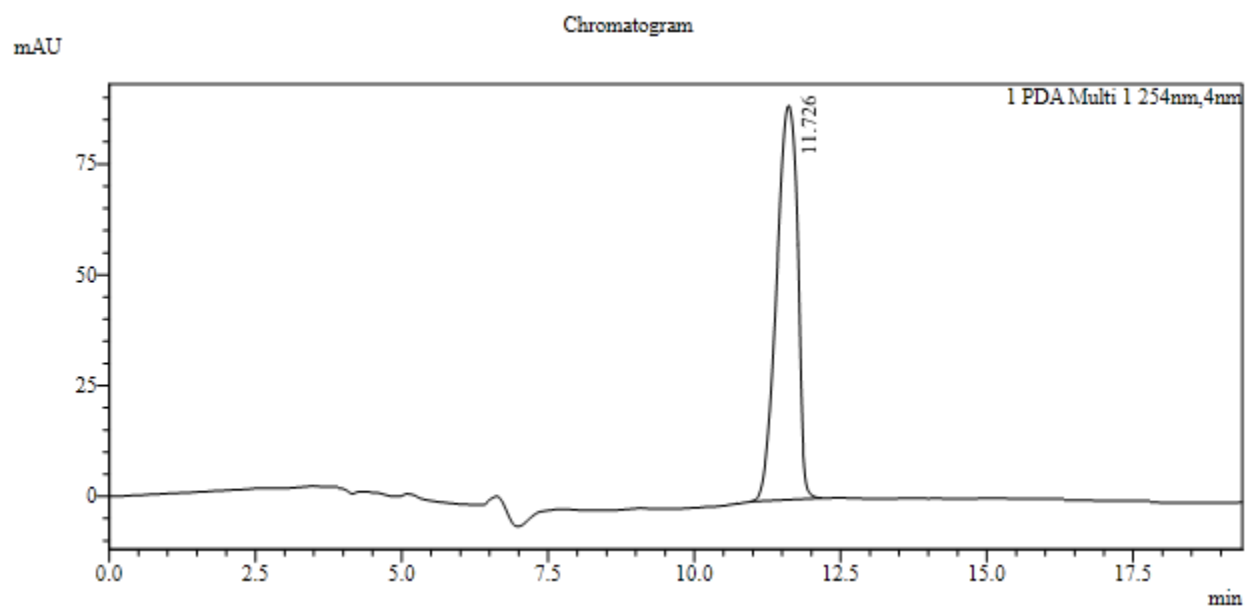

**Figure S4.** HPLC of compound **2bb**

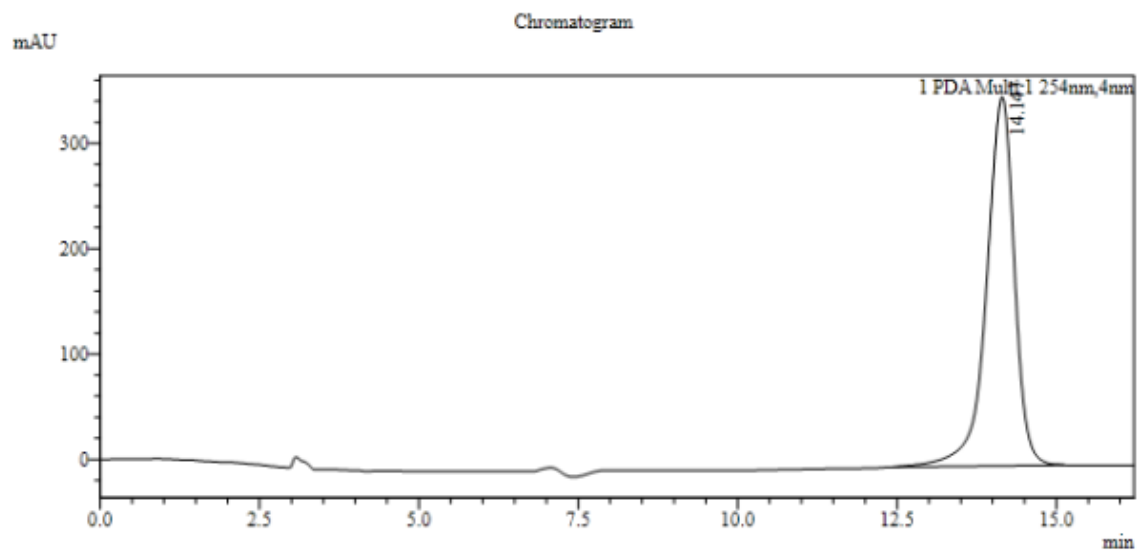

**Figure S5.** HPLC of compound **2bc**

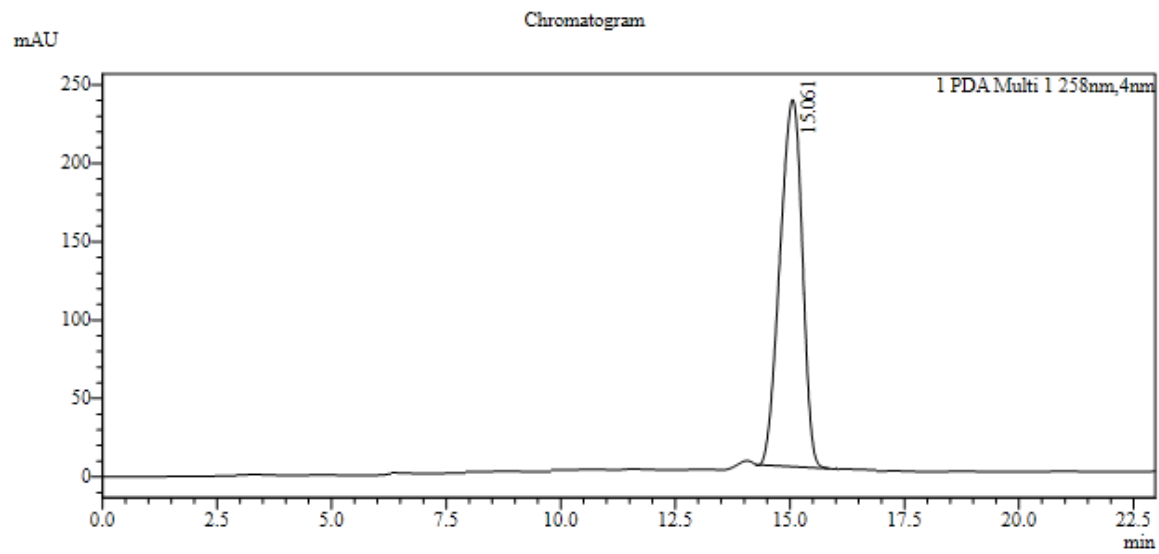

**Figure S6.** HPLC of compound **2cb**

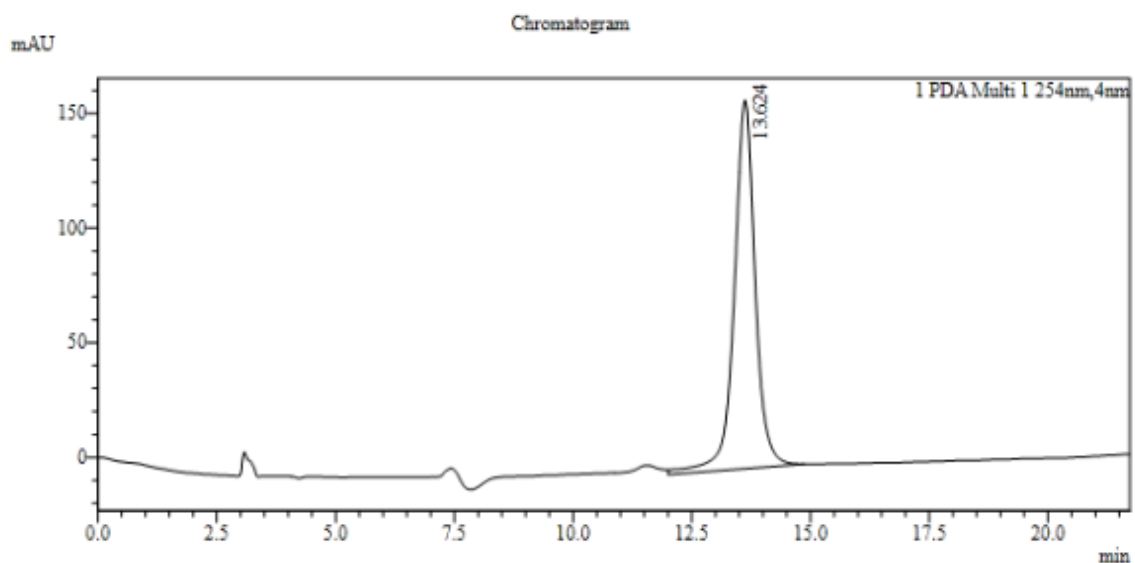

**Figure S7.** HPLC of compound **2cc**

Exchange reaction between oxindolyl-thiazolidinedione (**2aa**) with isatin (**1a**)

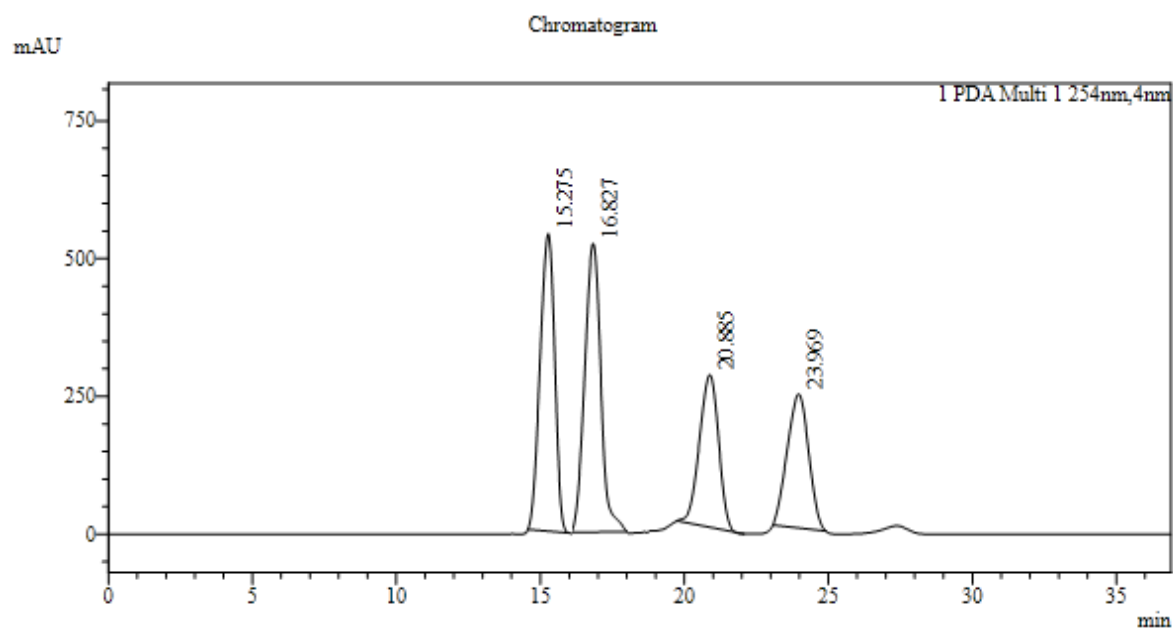

**Figure S8.** HPLC of crude reaction mixture at 24 h, pH 6. [2aa:  $R_t = 16.827$  min, 1a:  $R_t = 20.885$  min, 2ab:  $R_t = 15.275$  min, 1b:  $R_t = 23.969$  min]



Exchange reaction between oxindolyl-thiazolidinedione (**2aa**) with isatin (**1c**)

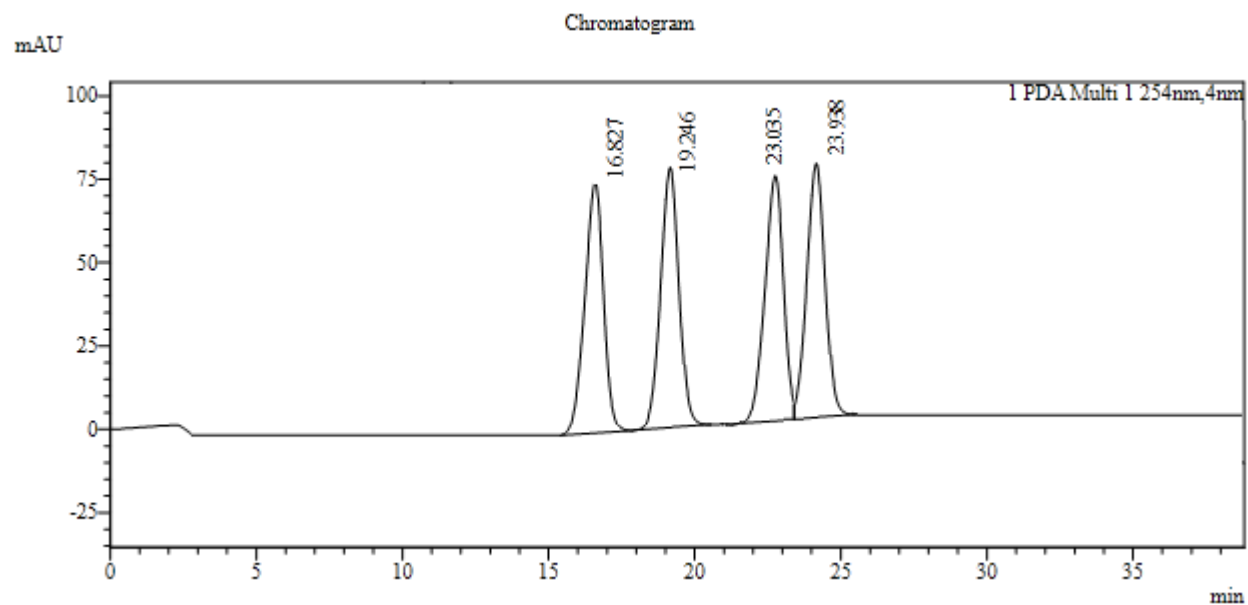

**Figure S9.** HPLC of crude reaction mixture at 24 h, pH 6. [2aa:  $R_t = 16.827$  min, 1c:  $R_t = 23.035$  min, 2ac:  $R_t = 19.246$  min, 1b:  $R_t = 23.938$  min]

Exchange reaction between oxindolyl-thiazolidinedione (**2ca**) with isatin (**1c**)

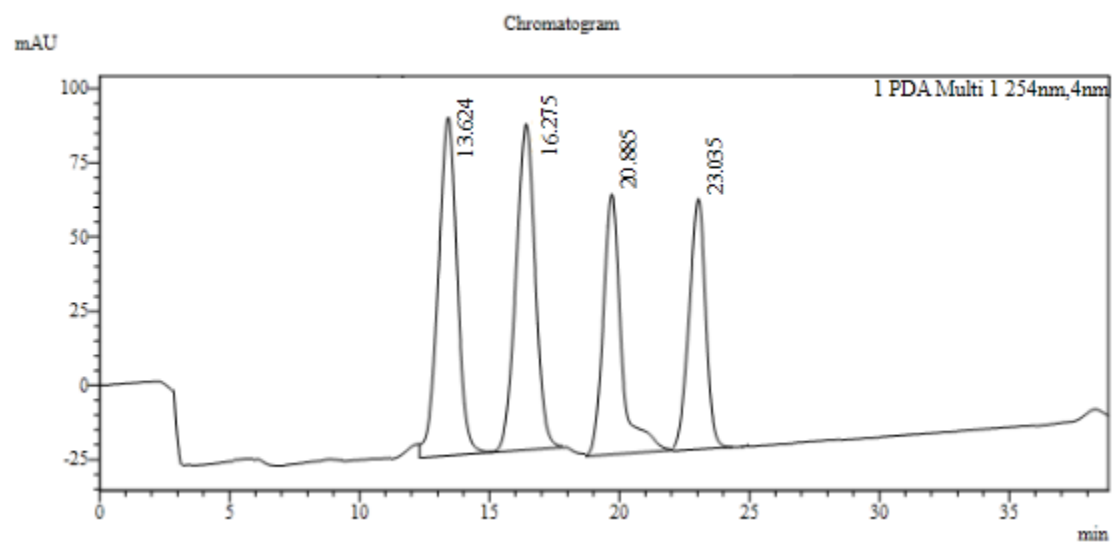

**Figure S10.** HPLC of crude reaction mixture at 24 h, pH 6. [2ca:  $R_t = 16.275$  min, 1c:  $R_t = 23.035$  min, 2cc:  $R_t = 13.624$  min, 1a:  $R_t = 20.885$  min]

Exchange reaction between oxindolyl-thiazolidinedione (**2bd**) with isatin (**1b**)

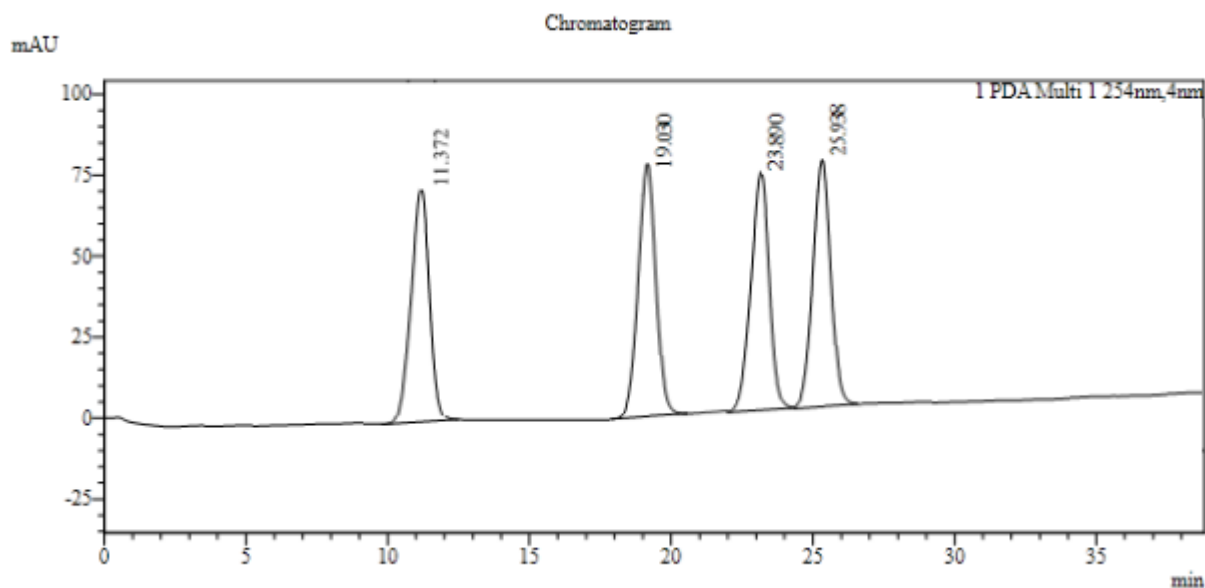

**Figure S11.** HPLC of crude reaction mixture at 24 h, pH 6. [2bd:  $R_t = 19.030$  min, 1b:  $R_t = 23.890$  min, 2bb:  $R_t = 11.372$  min, 1d:  $R_t = 25.938$  min]

Exchange reaction between oxindolyl-thiazolidinedione (**2cb**) with isatin (**1c**)

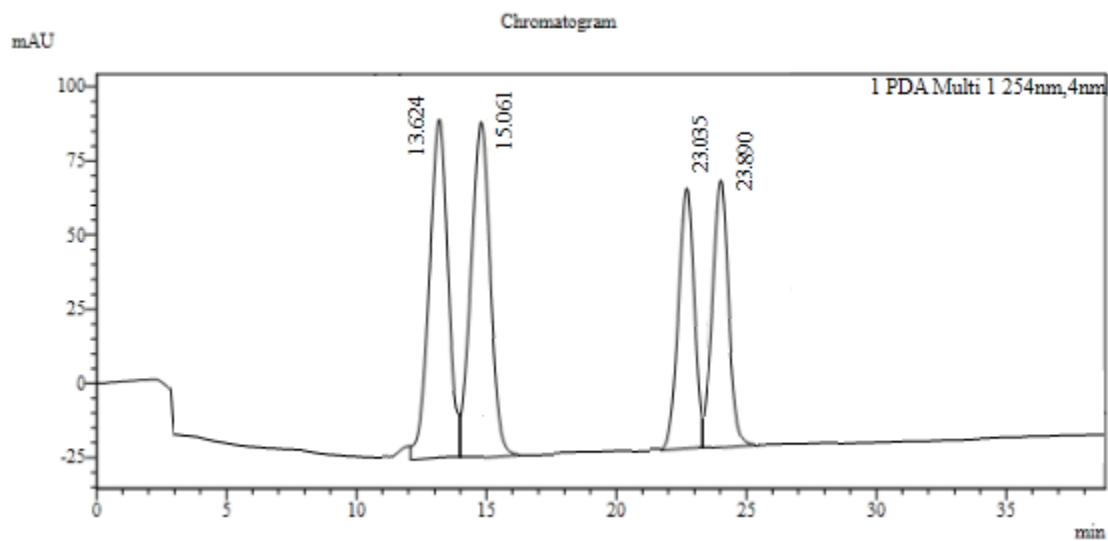

**Figure S12.** HPLC of crude reaction mixture at 24 h, pH 6. [2cb:  $R_t = 15.061$  min, 1b:  $R_t = 23.890$  min, 2cc:  $R_t = 13.624$  min, 1c:  $R_t = 20.035$  min]

Exchange reaction between oxindolyl-thiazolidinedione (**2bc**) with isatin (**1b**)

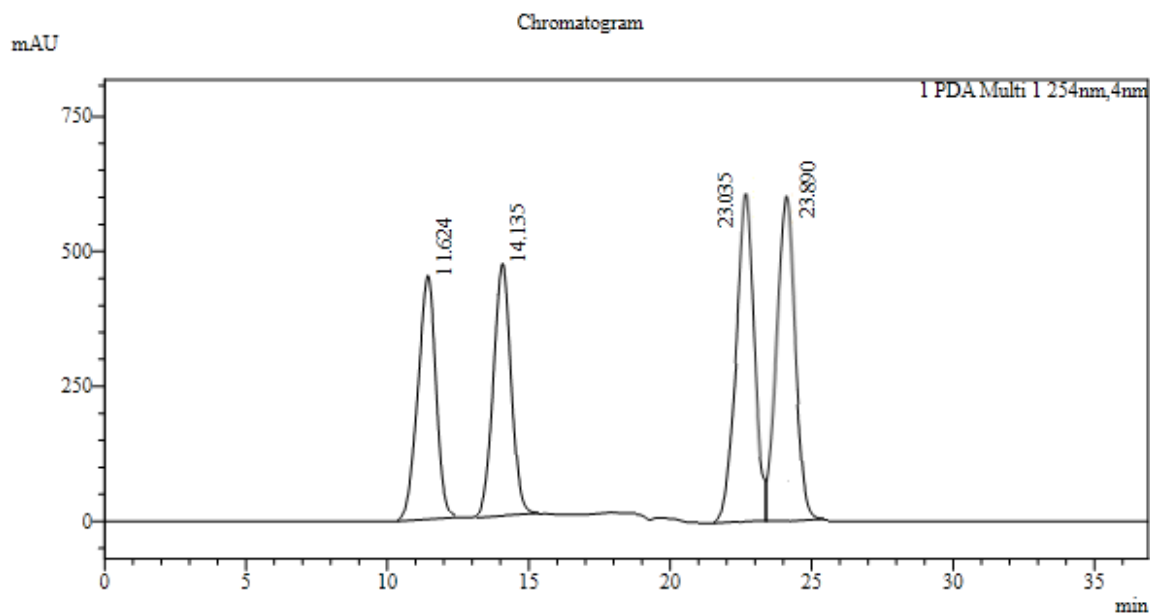

**Figure S13.** HPLC of crude reaction mixture at 24 h, pH 6. [2bc:  $R_t = 14.135$  min, 1b:  $R_t = 23.890$  min, 2bb:  $R_t = 11.624$  min, 1c:  $R_t = 20.035$  min]

Exchange reaction between oxindolyl-thiazolidinedione (**2ad**) with isatin (**1b**)

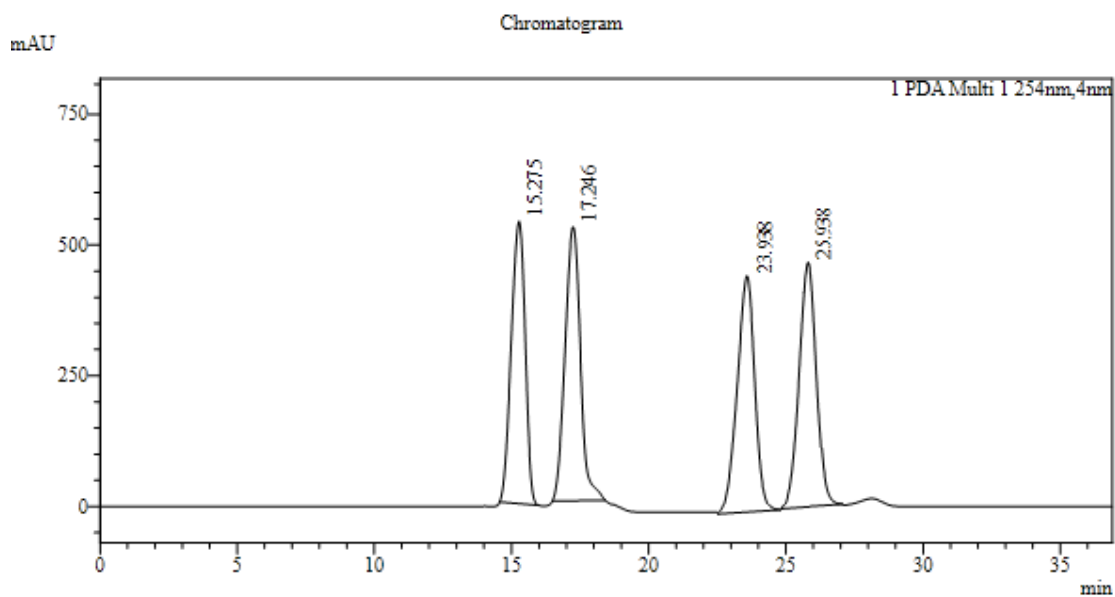

**Figure S14.** HPLC of crude reaction mixture at 24 h, pH 6. [2ad:  $R_t = 17.246$  min, 1b:  $R_t = 23.938$  min, 2ab:  $R_t = 15.275$  min, 1d:  $R_t = 25.938$  min]

Exchange reaction between oxindolyl-thiazolidinedione (**2ad**) with isatin (**1a**)

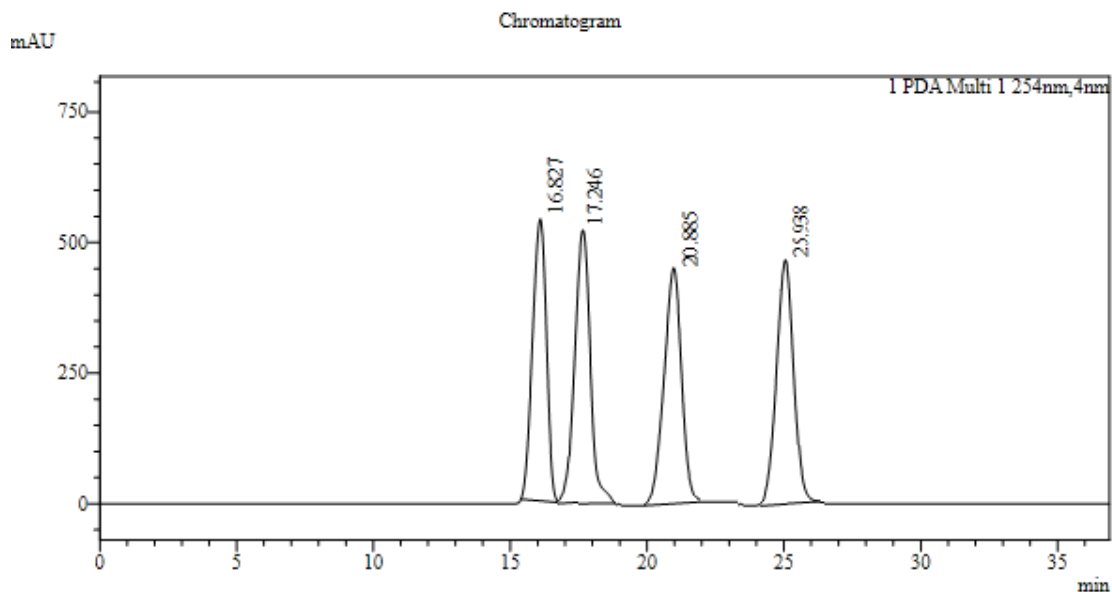

**Figure S15.** HPLC of crude reaction mixture at 24 h, pH 6. [2ad:  $R_t = 17.246$  min, 1a:  $R_t = 20.885$  min, 2aa:  $R_t = 16.827$  min, 1d:  $R_t = 25.938$  min]

Exchange reaction between oxindolyl-thiazolidinedione (**2aa**) with thiazolidinedione (**3a**)

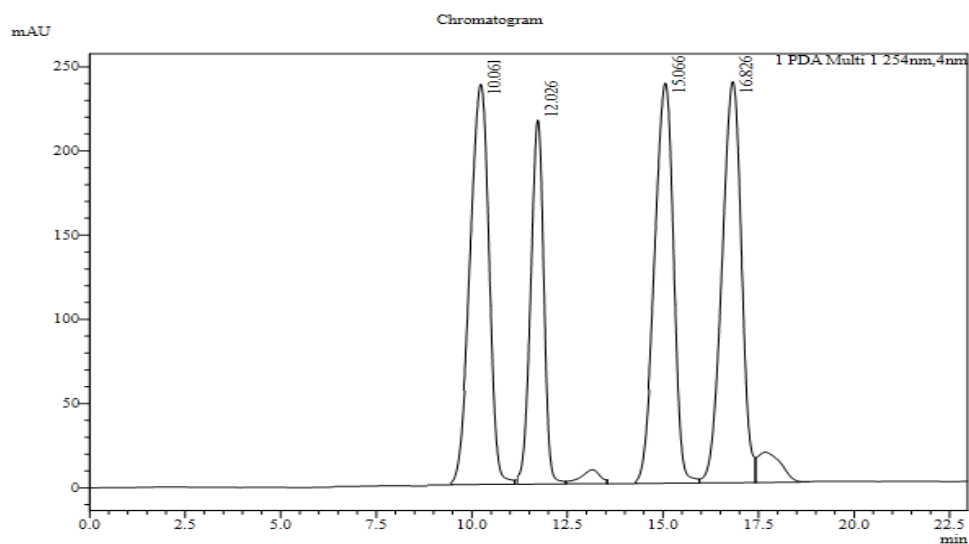

**Figure S16.** HPLC of crude reaction mixture at 24 h, pH 6. [2aa:  $R_t = 16.826$  min, 3a:  $R_t = 10.061$  min, 2cb:  $R_t = 15.066$  min, 3b:  $R_t = 12.026$  min]

Cross exchange reaction between oxindolyl-thiazolidinediones (**2aa** and **2ba**)

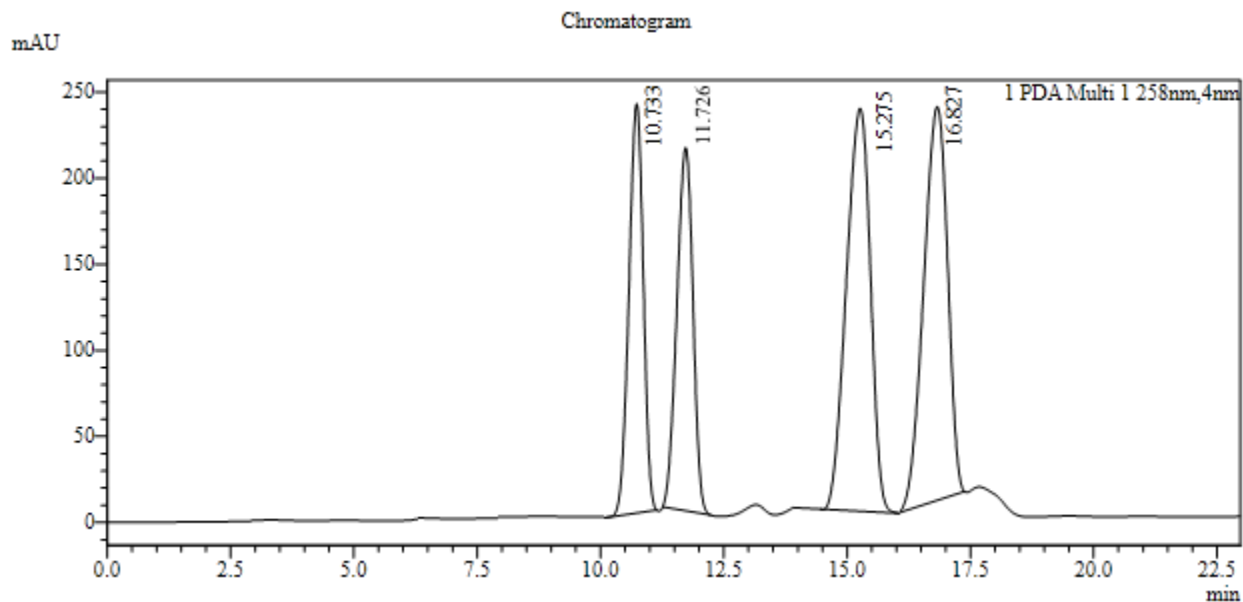

**Figure S17.** HPLC of crude reaction mixture at 24 h, pH 6. [2aa:  $R_t = 16.827$  min, 2ba:  $R_t = 10.733$  min, 2bb:  $R_t = 11.726$  min, 2ab:  $R_t = 15.275$  min]

Exchange reaction between oxindolyl-thiazolidinedione (**2bb**) with oxindole (**6a**)

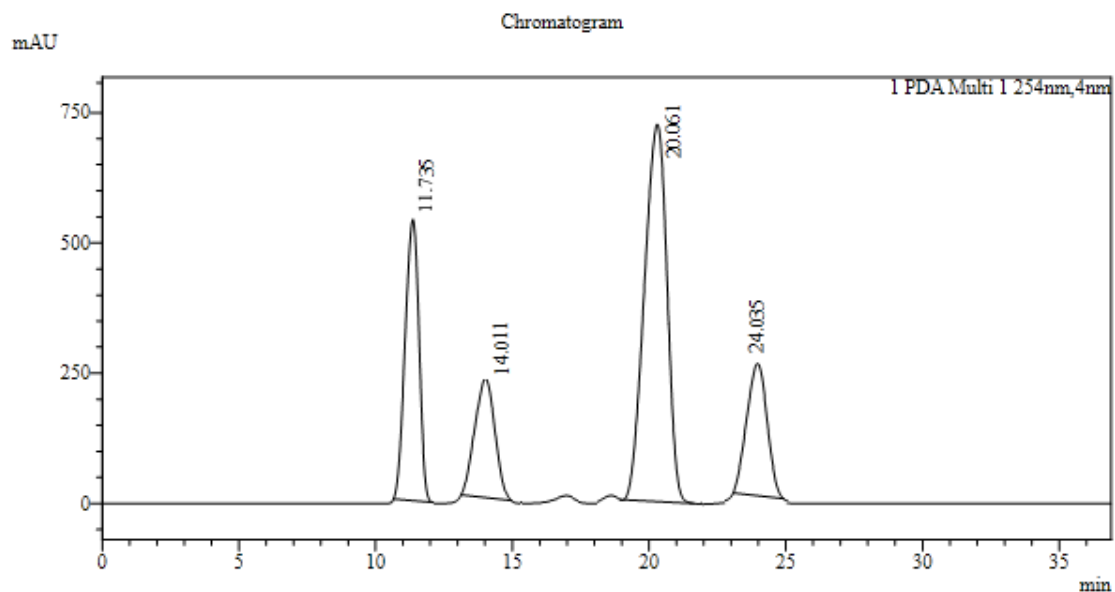

**Figure S18.** HPLC of crude reaction mixture at 24 h, pH 6. [2bb:  $R_t = 11.735$  min, 6a:  $R_t = 20.061$  min, 7aa:  $R_t = 14.011$  min, 3d:  $R_t = 24.035$  min]

Exchange reaction between oxindolyl-thiazolidinedione (**2bb**) with oxindole (**6d**)

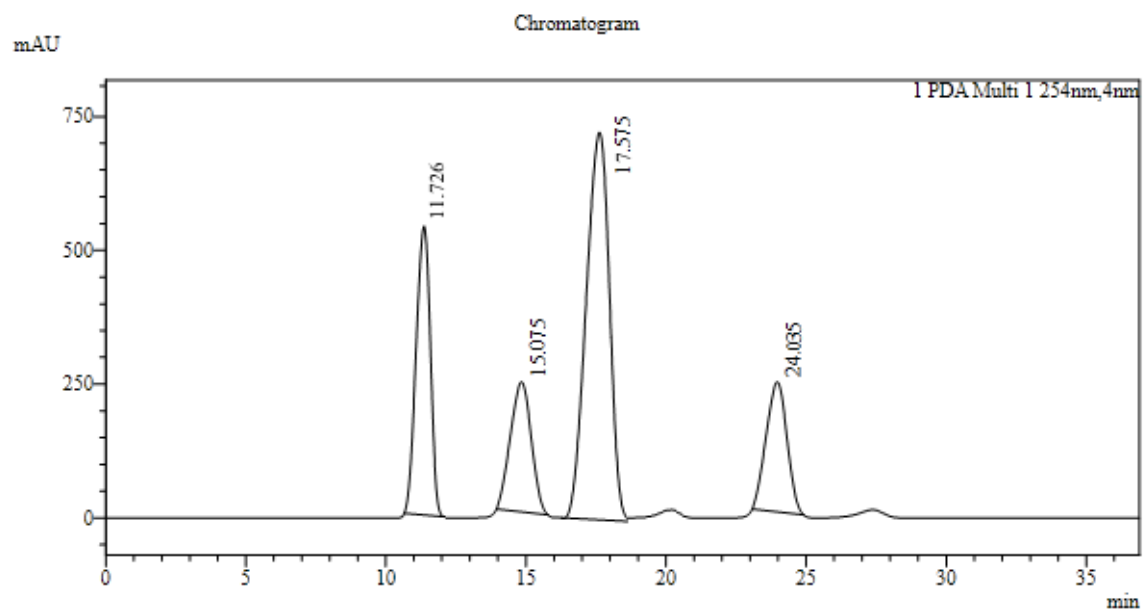

**Figure S19.** HPLC of crude reaction mixture at 24 h, pH 6. [2bb:  $R_t = 11.726$  min, 6d:  $R_t = 15.075$  min, 7da:  $R_t = 17.575$  min, 3d:  $R_t = 24.035$  min]

Exchange reaction between oxindolyl-thiazolidinedione (**2bc**) with oxindole (**6b**)

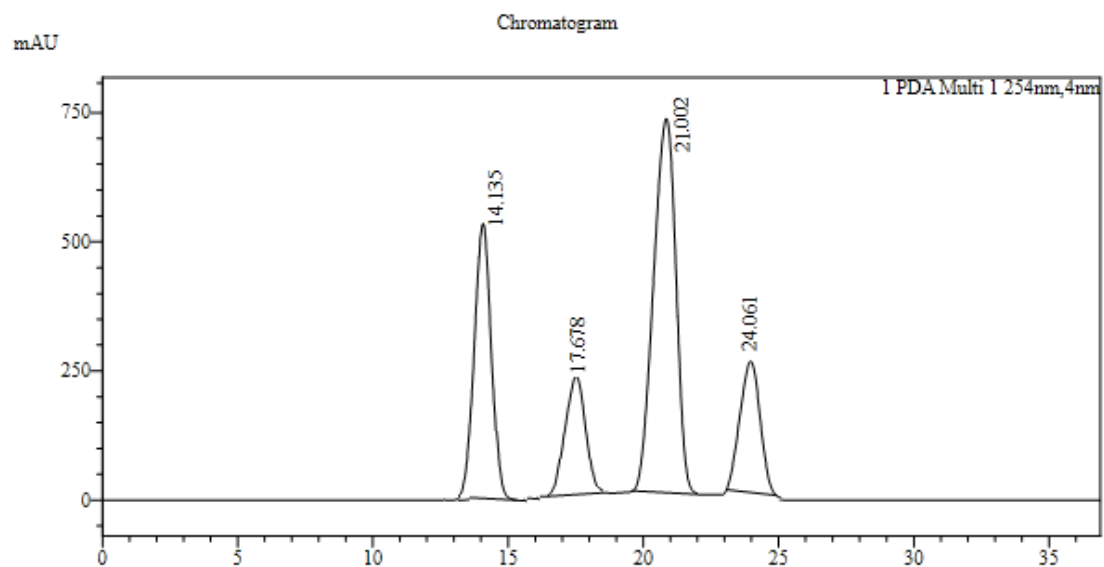

**Figure S20.** HPLC of crude reaction mixture at 24 h, pH 6. [2bc:  $R_t = 14.135$  min, 6b:  $R_t = 17.678$  min, 7bb:  $R_t = 21.002$  min, 3d:  $R_t = 24.061$  min]

## **9.0 X-Ray Crystallography of 2ab and 7aa.**

Crystallization of compounds **2ab** and **7aa** were carried out using vapor diffusion method. A solution of the compound was prepared in chloroform in a small glass vial and it was then placed in a larger container containing hexane and the outer vessel wall was sealed. Over time hexane evaporated and diffused over the gas phase in chloroform leading to oversaturation and finally crystallization. The crystals were then analyzed.

Intensity data was collected on a Bruker's Kappa Apex II CCD Duo diffractometer with graphite mono chromated MoK $\alpha$  radiation (0.71073 Å) at the temperature of 296 K. Scaling and multi-scan absorption correction were employed using SADABS. The structure was solved by direct methods and all the non-hydrogen atoms were refined an isotopically while the hydrogen atoms fixed in the predetermined positions by Shelxs-97 and Shelxl-97 packages respectively.

**Table S3: Crystal data and structure refinement for 2ab.**

|                                       |                                                                 |
|---------------------------------------|-----------------------------------------------------------------|
| Identification code                   | <b>2ab</b>                                                      |
| Empirical formula                     | C <sub>25</sub> H <sub>20</sub> N <sub>2</sub> O <sub>4</sub> S |
| Formula weight                        | 444.49                                                          |
| Temperature/K                         | 100(2)                                                          |
| Crystal system                        | monoclinic                                                      |
| Space group                           | P2 <sub>1</sub> /c                                              |
| a/Å                                   | 12.7003(9)                                                      |
| b/Å                                   | 10.7468(7)                                                      |
| c/Å                                   | 16.0028(11)                                                     |
| $\alpha$ /°                           | 90                                                              |
| $\beta$ /°                            | 105.880(2)                                                      |
| $\gamma$ /°                           | 90                                                              |
| Volume/Å <sup>3</sup>                 | 2100.8(2)                                                       |
| Z                                     | 4                                                               |
| $\rho_{\text{calc}}$ /cm <sup>3</sup> | 1.405                                                           |

|                                                |                                                               |
|------------------------------------------------|---------------------------------------------------------------|
| $\mu/\text{mm}^{-1}$                           | 0.191                                                         |
| F(000)                                         | 928.0                                                         |
| Crystal size/ $\text{mm}^3$                    | .20 × .18 × .16                                               |
| Radiation                                      | MoK $\alpha$ ( $\lambda = 0.71073$ )                          |
| 2 $\Theta$ range for data collection/ $^\circ$ | 4.622 to 49.99                                                |
| Index ranges                                   | -15 ≤ h ≤ 15, -12 ≤ k ≤ 12, -19 ≤ l ≤ 19                      |
| Reflections collected                          | 18977                                                         |
| Independent reflections                        | 3670 [R <sub>int</sub> = 0.0686, R <sub>sigma</sub> = 0.0447] |
| Data/restraints/parameters                     | 3670/0/290                                                    |
| Goodness-of-fit on F <sup>2</sup>              | 1.057                                                         |
| Final R indexes [I ≥ 2 $\sigma$ (I)]           | R <sub>1</sub> = 0.0351, wR <sub>2</sub> = 0.0892             |
| Final R indexes [all data]                     | R <sub>1</sub> = 0.0409, wR <sub>2</sub> = 0.0958             |
| Largest diff. peak/hole / e Å <sup>-3</sup>    | 0.28/-0.28                                                    |

**Table S4: Bond Lengths for 2ab.**

| Atom | Atom | Length/Å    | Atom | Atom | Length/Å  |
|------|------|-------------|------|------|-----------|
| S001 | C00F | 1.7640 (17) | C00C | C00L | 1.388 (2) |
| S001 | C00H | 1.8133 (16) | C00C | C00D | 1.391 (2) |
| O002 | C008 | 1.2088 (19) | C00C | C00I | 1.516 (2) |
| O003 | C00E | 1.4129 (18) | C00D | C00P | 1.385 (2) |
| O004 | C00A | 1.2271 (19) | C00G | C00J | 1.507 (2) |
| N006 | C008 | 1.373 (2)   | C00J | C00R | 1.389 (2) |
| N006 | C00F | 1.388 (2)   | C00J | C00U | 1.391 (2) |
| N006 | C00G | 1.477 (2)   | C00K | C00O | 1.395 (2) |
| N007 | C00A | 1.351 (2)   | C00L | C00N | 1.394 (2) |
| N007 | C009 | 1.418 (2)   | C00M | C00Q | 1.395 (2) |
| N007 | C00I | 1.465 (2)   | C00N | C00S | 1.380 (3) |



|      |      |           |      |      |           |
|------|------|-----------|------|------|-----------|
| C008 | C00H | 1.517 (2) | C00O | C00Q | 1.384 (2) |
| C009 | C00K | 1.381 (2) | C00P | C00S | 1.389 (3) |
| C009 | C00B | 1.393 (2) | C00R | C00W | 1.389 (3) |
| C00A | C00E | 1.554 (2) | C00T | C00U | 1.382 (2) |
| C00B | C00M | 1.388 (2) | C00T | C00V | 1.388 (3) |
| C00B | C00E | 1.510 (2) | C00V | C00W | 1.381 (3) |

**Table S5: Bond Angles for 2ab.**

| Atom | Atom | Atom | Angle/°     | Atom | Atom | Atom | Angle/°     |
|------|------|------|-------------|------|------|------|-------------|
| C00F | S001 | C00H | 92.69 (7)   | C00B | C00E | C00A | 109.68 (12) |
| C008 | N006 | C00F | 117.01 (13) | C00H | C00E | C00A | 124.45 (15) |
| C008 | N006 | C00G | 121.78 (13) | O005 | C00F | N006 | 124.54 (13) |
| C00F | N006 | C00G | 121.21 (13) | O005 | C00F | S001 | 111.01 (12) |
| C00A | N007 | C009 | 110.96 (13) | N006 | C00F | S001 | 111.00 (13) |
| C00A | N007 | C00I | 124.76 (13) | N006 | C00G | C00J | 112.51 (12) |
| C009 | N007 | C00I | 124.28 (13) | C008 | C00H | C00E | 106.71 (11) |
| O002 | C008 | N006 | 124.12 (14) | C008 | C00H | S001 | 111.23 (10) |
| O002 | C008 | C00H | 123.53 (14) | C00E | C00H | S001 | 111.86 (13) |
| N006 | C008 | C00H | 112.35 (13) | N007 | C00I | C00C | 118.96 (16) |
| C00K | C009 | C00B | 122.41 (15) | C00R | C00J | C00U | 121.02 (15) |
| C00K | C009 | N007 | 127.56 (15) | C00R | C00J | C00G | 117.28 (15) |
| C00B | C009 | N007 | 110.00 (13) | C00U | C00J | C00G | 120.32 (16) |
| O004 | C00A | N007 | 125.90 (15) | C009 | C00K | C00O | 117.28 (15) |
| O004 | C00A | C00E | 125.41 (14) | C00C | C00L | C00N | 120.32 (16) |
| N007 | C00A | C00E | 108.63 (12) | C00B | C00M | C00Q | 118.48 (15) |
| C00M | C00B | C009 | 119.72 (14) | C00S | C00N | C00L | 120.24 (16) |
| C00M | C00B | C00E | 131.62 (14) | C00Q | C00O | C00K | 121.16 (15) |
| C009 | C00B | C00E | 108.62 (13) | C00D | C00P | C00S | 120.00 (16) |



|                                             |                                                               |
|---------------------------------------------|---------------------------------------------------------------|
| Formula weight                              | 308.33                                                        |
| Temperature/K                               | 111(2)                                                        |
| Crystal system                              | monoclinic                                                    |
| Space group                                 | P2 <sub>1</sub> /c                                            |
| a/Å                                         | 11.9951(3)                                                    |
| b/Å                                         | 8.5493(2)                                                     |
| c/Å                                         | 15.5588(4)                                                    |
| α/°                                         | 90                                                            |
| β/°                                         | 109.0350(10)                                                  |
| γ/°                                         | 90                                                            |
| Volume/Å <sup>3</sup>                       | 1508.30(7)                                                    |
| Z                                           | 4                                                             |
| ρ <sub>calc</sub> /cm <sup>3</sup>          | 1.358                                                         |
| μ/mm <sup>-1</sup>                          | 0.094                                                         |
| F(000)                                      | 648.0                                                         |
| Crystal size/mm <sup>3</sup>                | .20 × .16 × .14                                               |
| Radiation                                   | MoKα (λ = 0.71073)                                            |
| 2Θ range for data collection/°              | 7.056 to 50                                                   |
| Index ranges                                | -14 ≤ h ≤ 14, -10 ≤ k ≤ 10, -17 ≤ l ≤ 18                      |
| Reflections collected                       | 12703                                                         |
| Independent reflections                     | 2637 [R <sub>int</sub> = 0.0359, R <sub>sigma</sub> = 0.0275] |
| Data/restraints/parameters                  | 2637/0/211                                                    |
| Goodness-of-fit on F <sup>2</sup>           | 1.057                                                         |
| Final R indexes [I ≥ 2σ (I)]                | R <sub>1</sub> = 0.0372, wR <sub>2</sub> = 0.0881             |
| Final R indexes [all data]                  | R <sub>1</sub> = 0.0447, wR <sub>2</sub> = 0.0947             |
| Largest diff. peak/hole / e Å <sup>-3</sup> | 0.30/-0.20                                                    |

**Table S7: Bond Lengths for 7aa.**

| Atom | Atom | Length/Å    | Atom | Atom | Length/Å  |
|------|------|-------------|------|------|-----------|
| O1   | C00F | 1.4126 (18) | C008 | C00H | 1.385 (2) |
| O002 | C007 | 1.2152 (18) | C008 | C00A | 1.393 (2) |
| O003 | C00D | 1.2240 (18) | C009 | C00A | 1.508 (2) |
| N004 | C007 | 1.364 (2)   | C009 | C00F | 1.550 (2) |
| N004 | C008 | 1.4074 (19) | C00A | C00E | 1.391 (2) |
| N004 | C00N | 1.454 (2)   | C00B | C00K | 1.381 (2) |
| N005 | C00D | 1.357 (2)   | C00C | C00I | 1.393 (2) |
| N005 | C00B | 1.4108 (19) | C00D | C00F | 1.549 (2) |
| N005 | C00M | 1.454 (2)   | C00E | C00L | 1.398 (2) |
| C006 | C00C | 1.381 (2)   | C00G | C00H | 1.377 (2) |
| C006 | C00B | 1.394 (2)   | C00G | C00L | 1.391 (2) |
| C006 | C00F | 1.509 (2)   | C00I | C00J | 1.391 (2) |
| C007 | C009 | 1.532 (2)   | C00J | C00K | 1.395 (2) |

**Table S8: Bond Angles for 7aa.**

| Atom | Atom | Atom | Angle/°     | Atom | Atom | Atom | Angle/°     |
|------|------|------|-------------|------|------|------|-------------|
| C007 | N004 | C008 | 111.43 (12) | C00K | C00B | C006 | 122.45 (14) |
| C007 | N004 | C00N | 123.17 (13) | C00K | C00B | N005 | 127.54 (14) |
| C008 | N004 | C00N | 125.37 (13) | C006 | C00B | N005 | 110.01 (13) |
| C00D | N005 | C00B | 110.96 (12) | C006 | C00C | C00I | 118.84 (14) |
| C00D | N005 | C00M | 124.07 (13) | O003 | C00D | N005 | 125.12 (14) |
| C00B | N005 | C00M | 124.94 (13) | O003 | C00D | C00F | 126.23 (14) |
| C00C | C006 | C00B | 119.80 (14) | N005 | C00D | C00F | 108.54 (12) |
| C00C | C006 | C00F | 131.56 (14) | C00A | C00E | C00L | 118.08 (15) |

|      |      |      |             |      |      |      |             |
|------|------|------|-------------|------|------|------|-------------|
| C00B | C006 | C00F | 108.64 (13) | O1   | C00F | C006 | 110.10 (12) |
| O002 | C007 | N004 | 125.94 (14) | O1   | C00F | C00D | 109.54 (12) |
| O002 | C007 | C009 | 126.28 (14) | C006 | C00F | C00D | 101.84 (12) |
| N004 | C007 | C009 | 107.74 (12) | O1   | C00F | C009 | 110.73 (12) |
| C00H | C008 | C00A | 121.94 (14) | C006 | C00F | C009 | 114.37 (12) |
| C00H | C008 | N004 | 128.30 (14) | C00D | C00F | C009 | 109.87 (12) |
| C00A | C008 | N004 | 109.76 (13) | C00H | C00G | C00L | 121.31 (15) |
| C00A | C009 | C007 | 102.90 (12) | C00G | C00H | C008 | 117.80 (15) |
| C00A | C009 | C00F | 114.34 (12) | C00J | C00I | C00C | 120.53 (15) |
| C007 | C009 | C00F | 110.13 (12) | C00I | C00J | C00K | 121.22 (14) |
| C00E | C00A | C008 | 120.03 (14) | C00B | C00K | C00J | 117.16 (15) |
| C00E | C00A | C009 | 131.82 (14) | C00G | C00L | C00E | 120.82 (15) |
| C008 | C00A | C009 | 108.14 (13) |      |      |      |             |

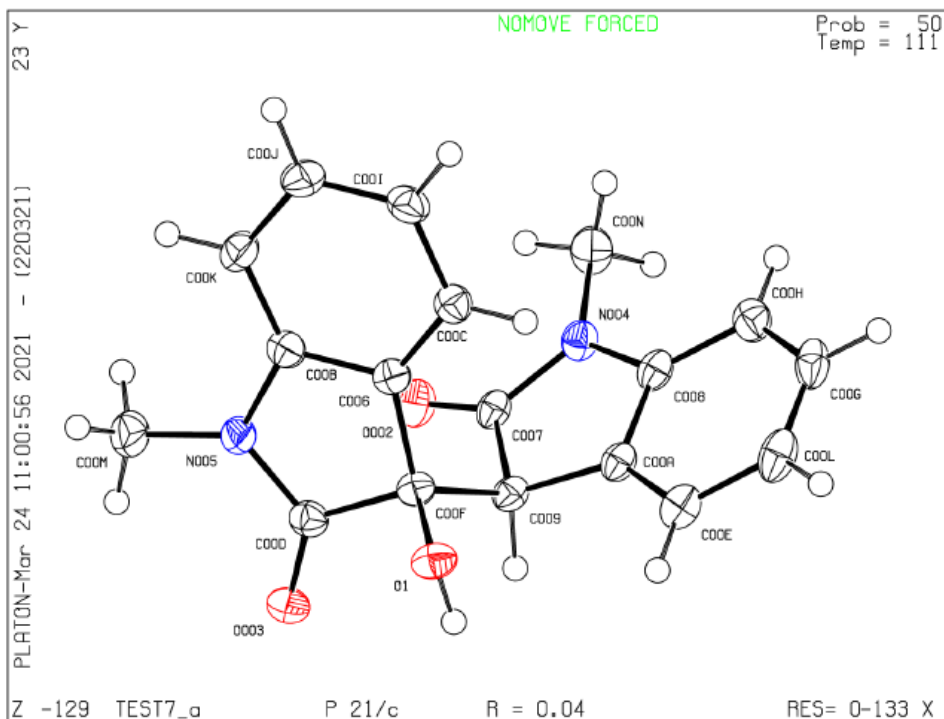

**Figure S22.** The ORTEP diagram of *anti-7aa* showing 50% probability thermal ellipsoid (CCDC 2170212).

## 10.0 NMR data:

### $^1\text{H}$ and $^{13}\text{C}$ of 2ab:

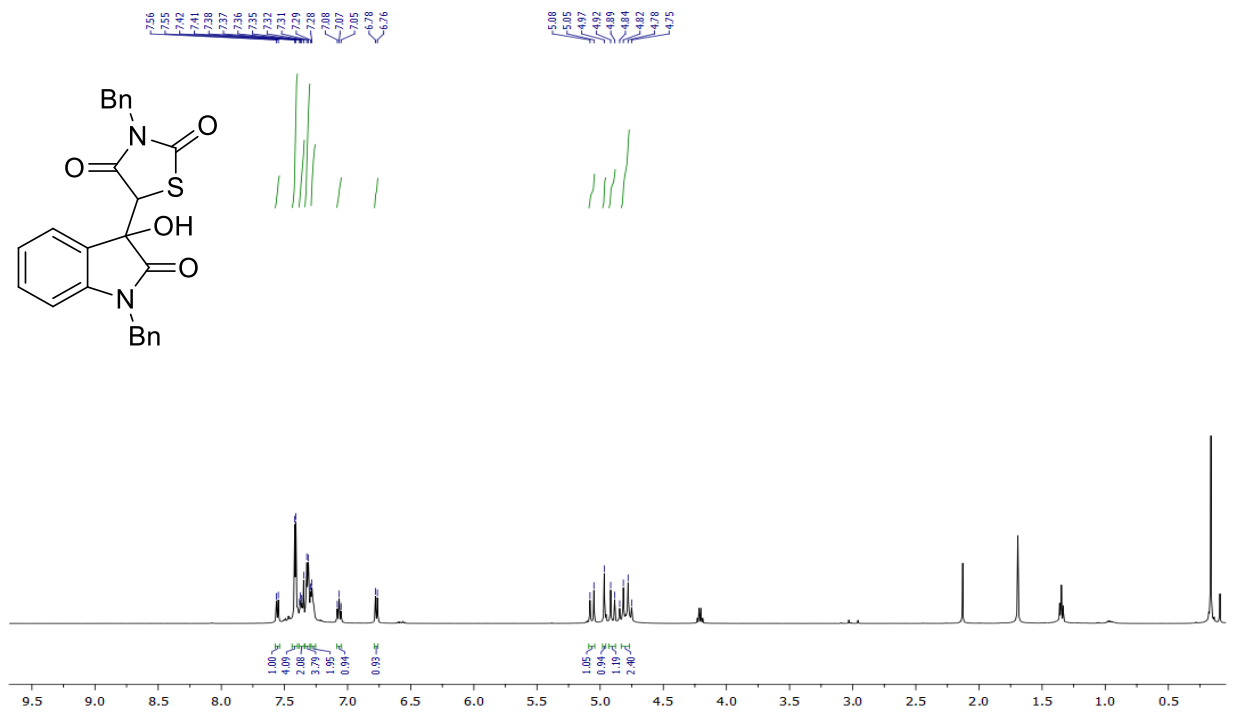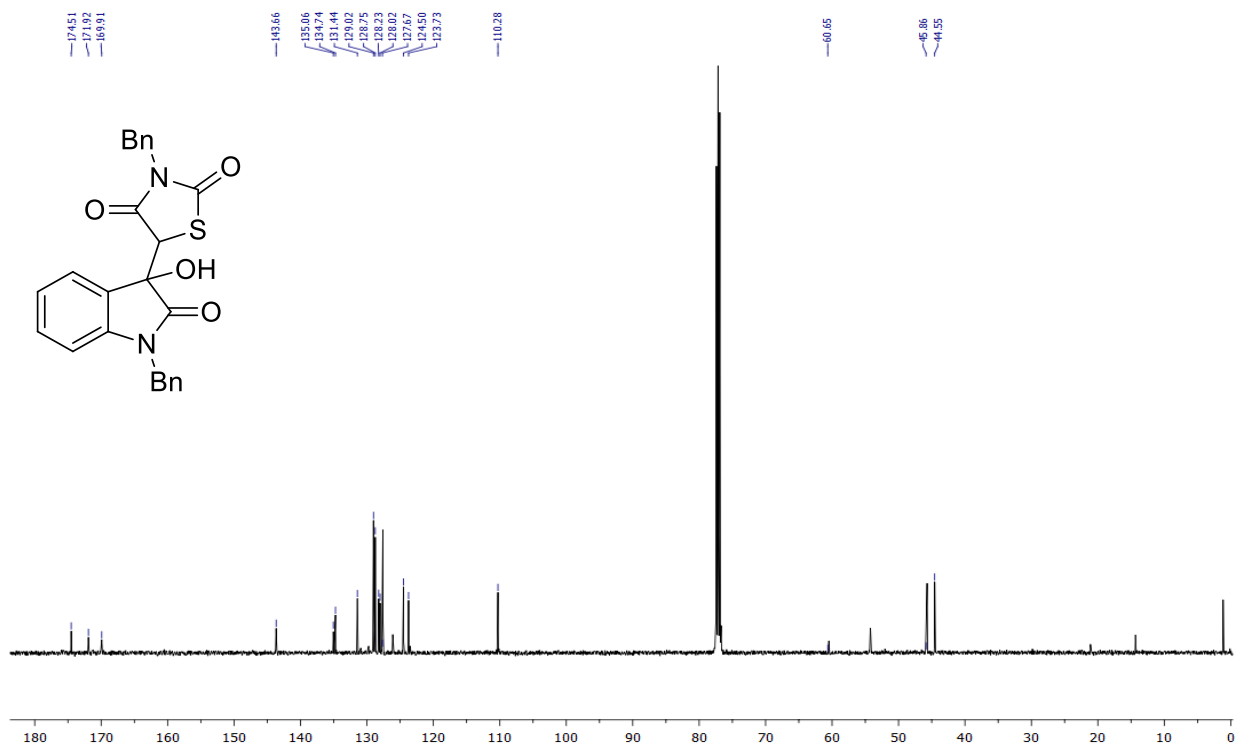

# $^1\text{H}$ and $^{13}\text{C}$ of 2ac:

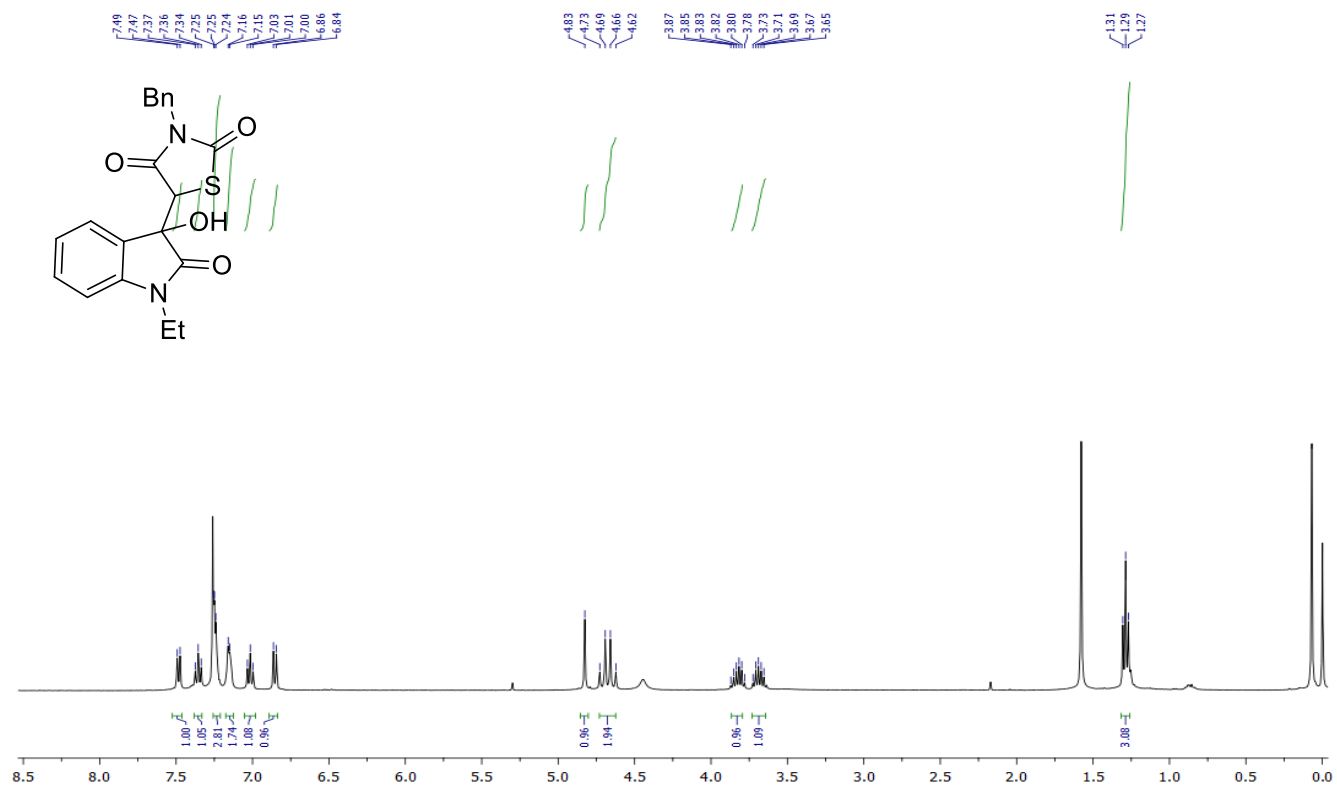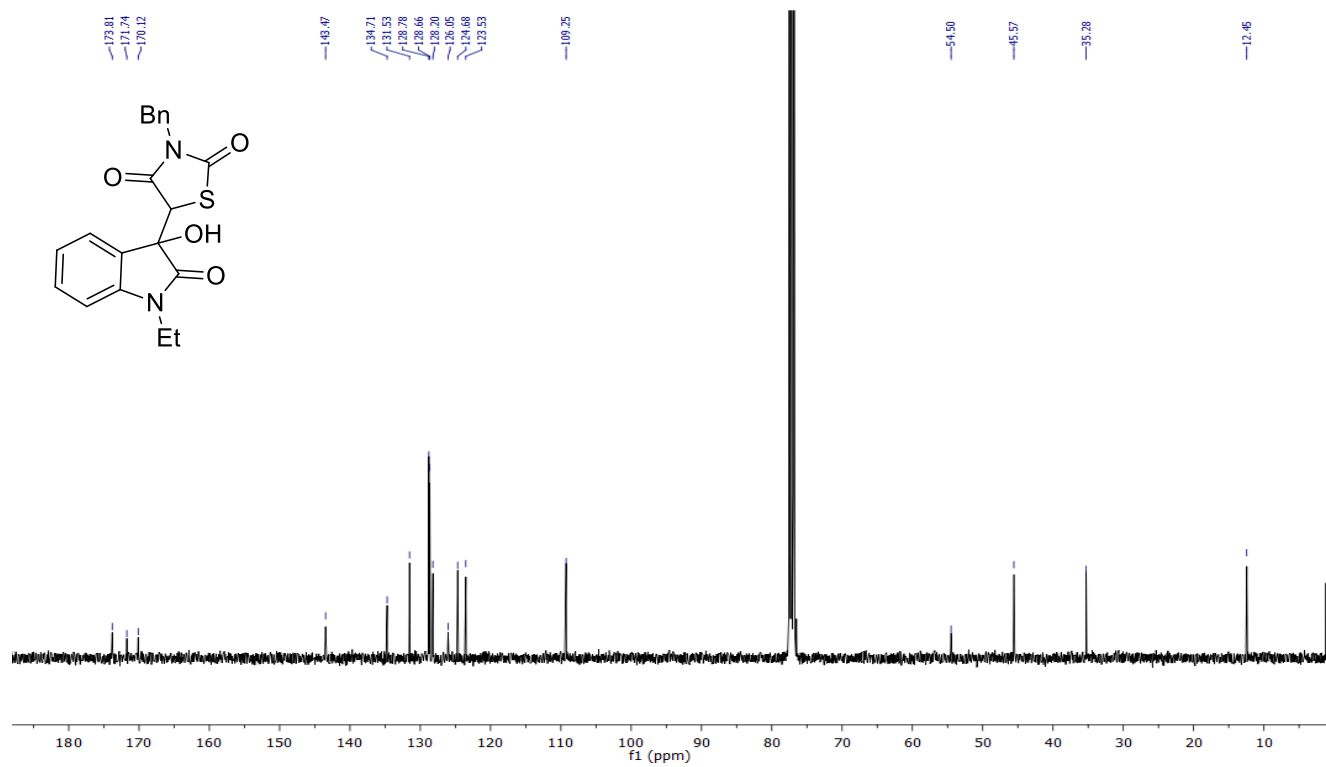

# $^1\text{H}$ and $^{13}\text{C}$ of 2ba:

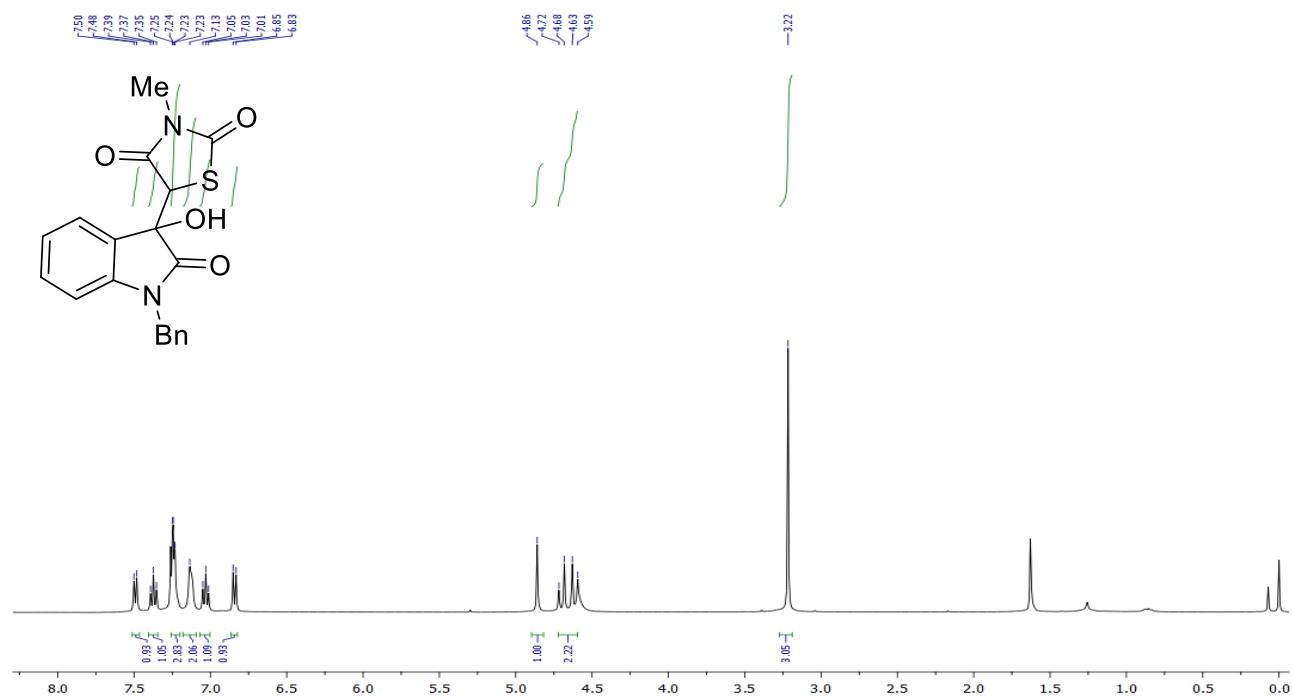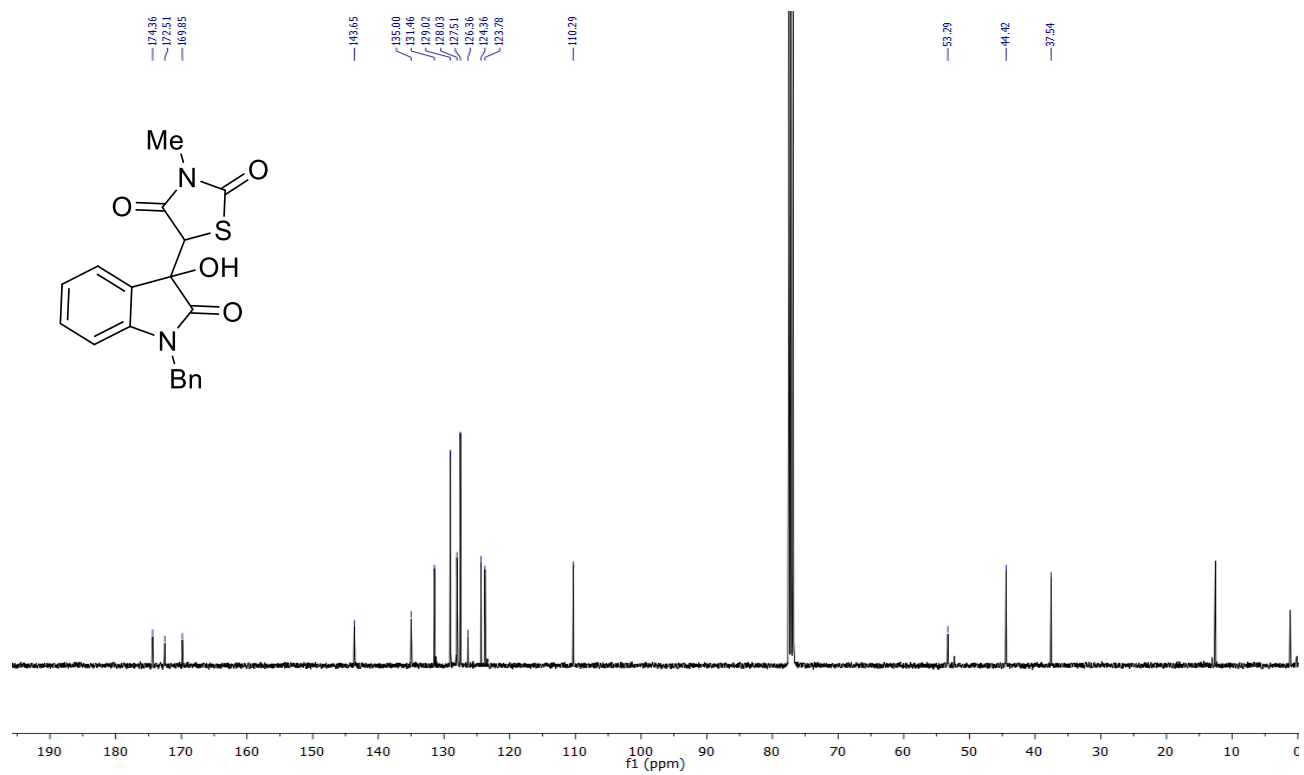



# <sup>1</sup>H and <sup>13</sup>C of 7aa:

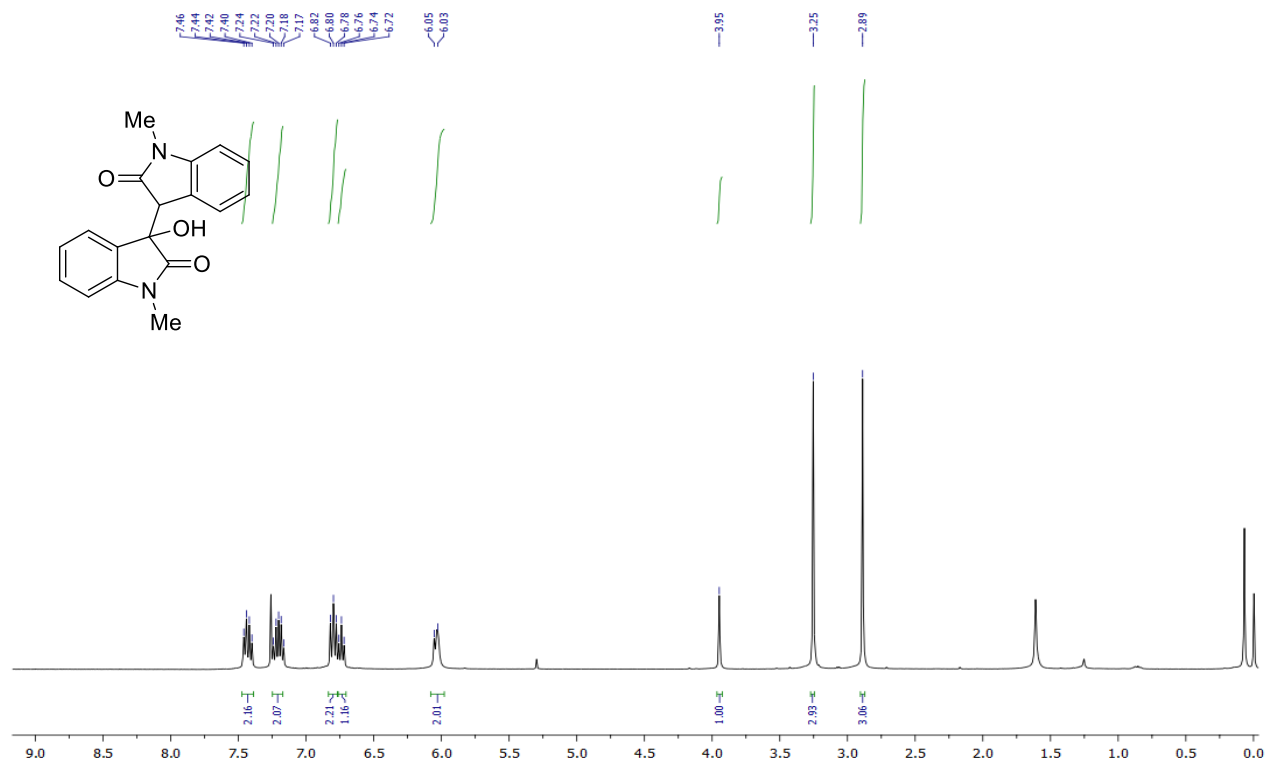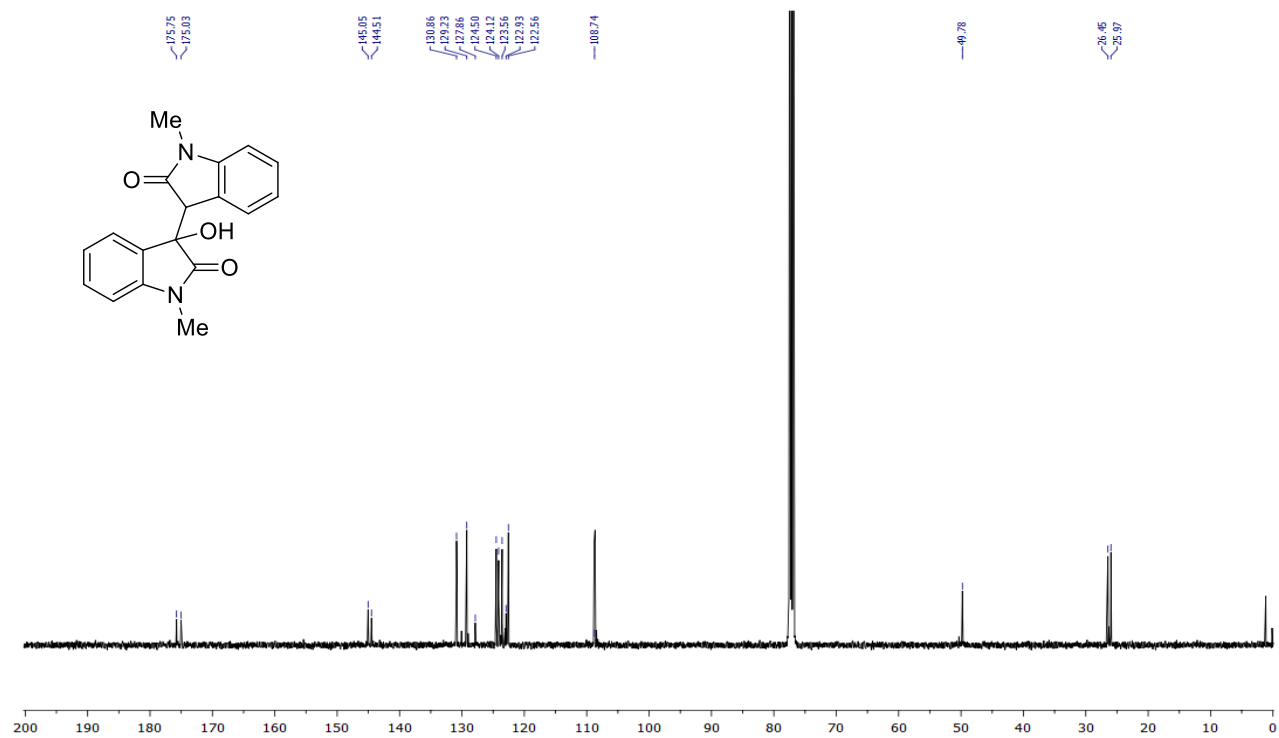

**$^1\text{H}$  and  $^{13}\text{C}$  of 7da:**

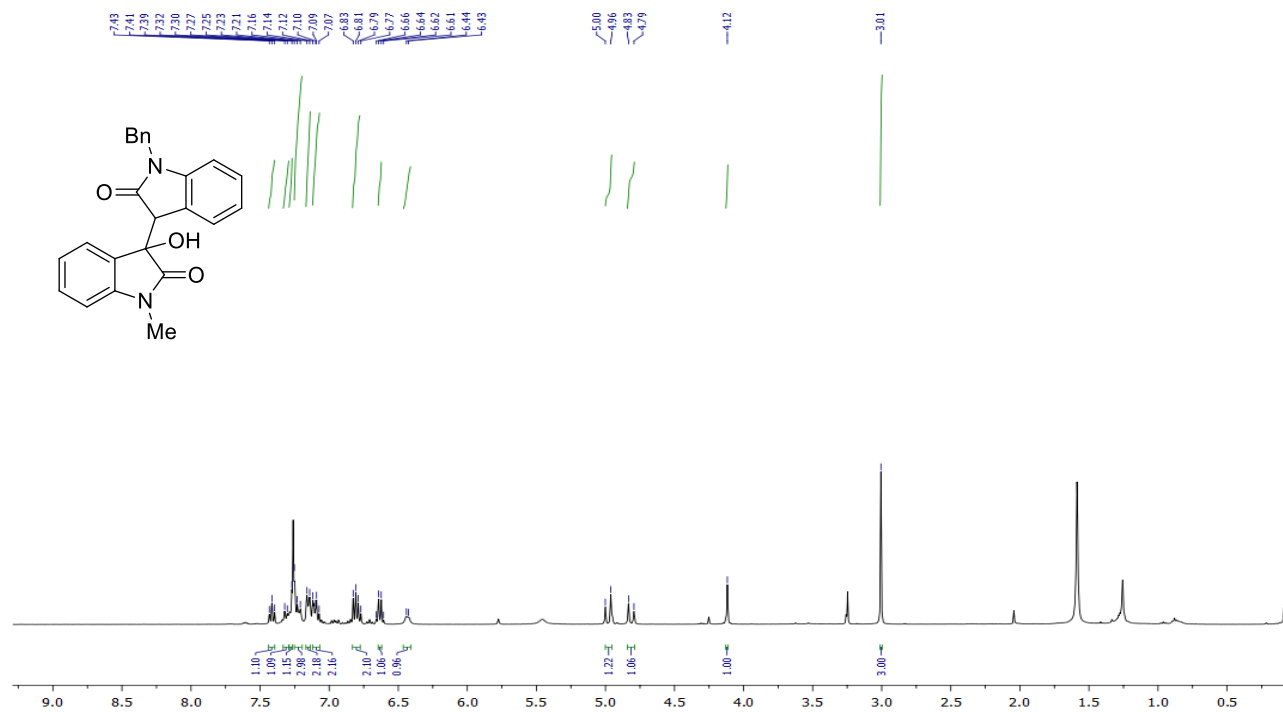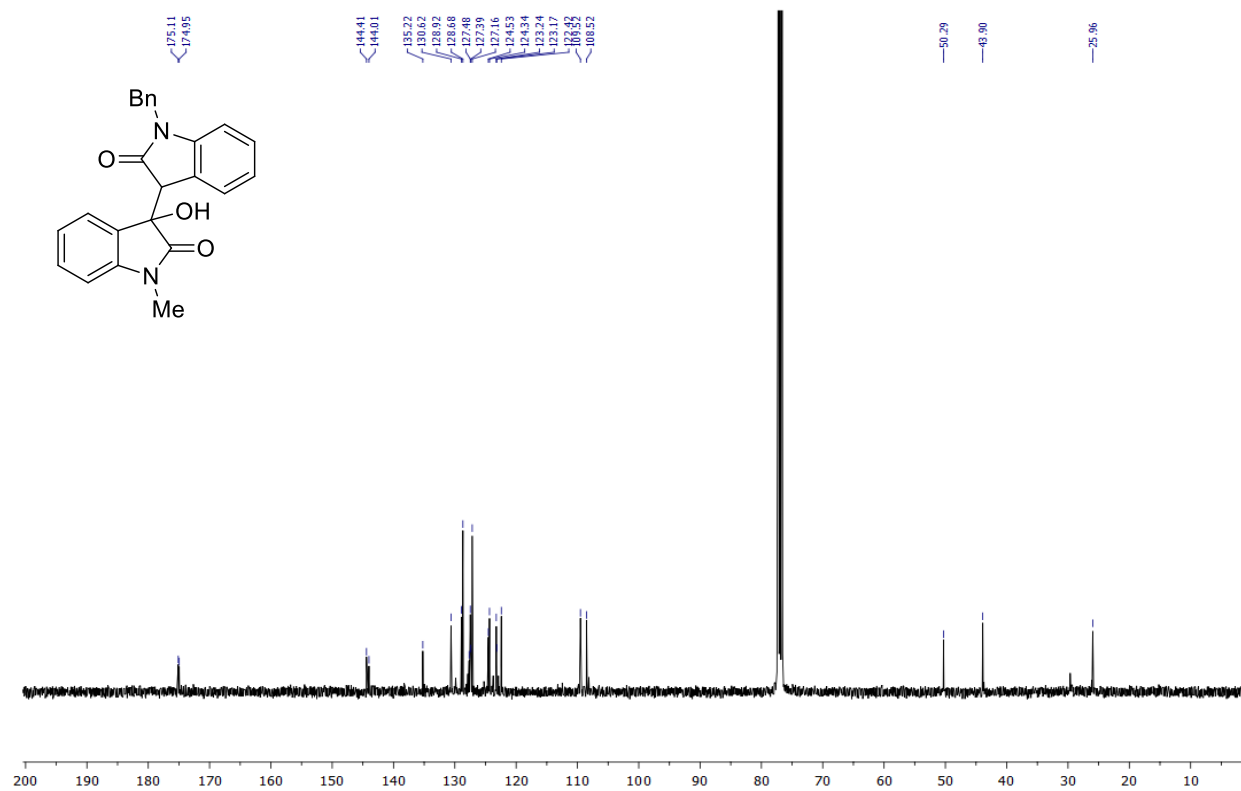

# <sup>1</sup>H and <sup>13</sup>C of 7bb:

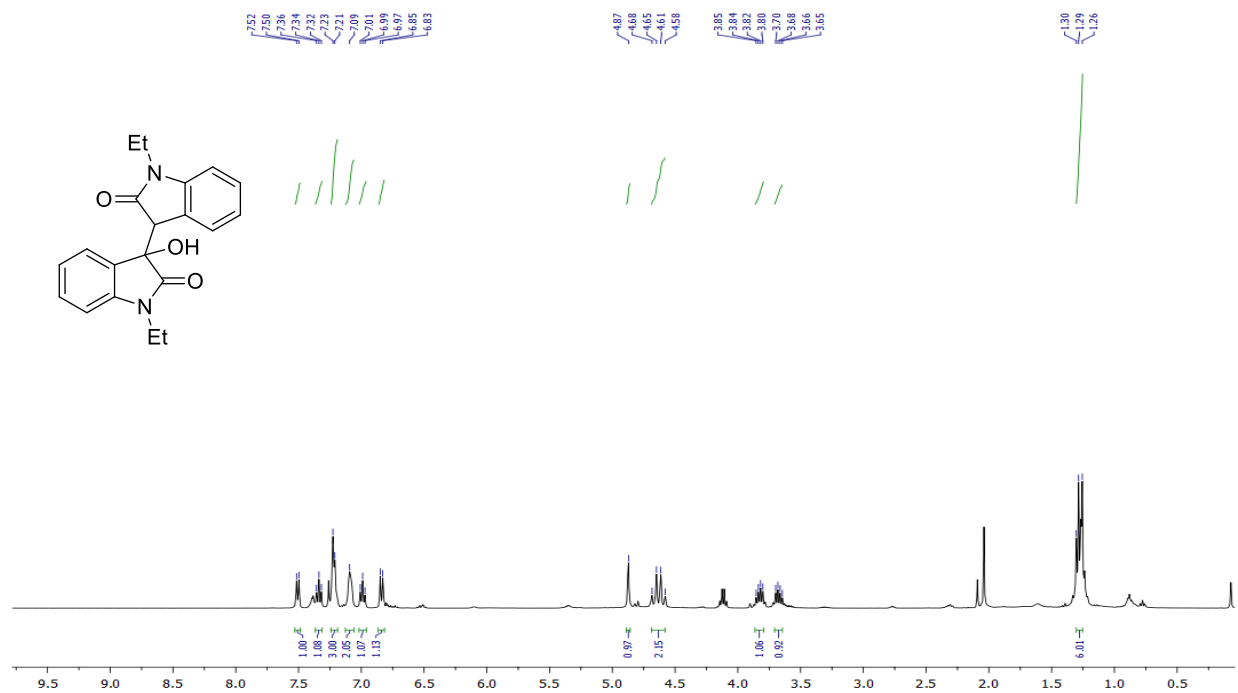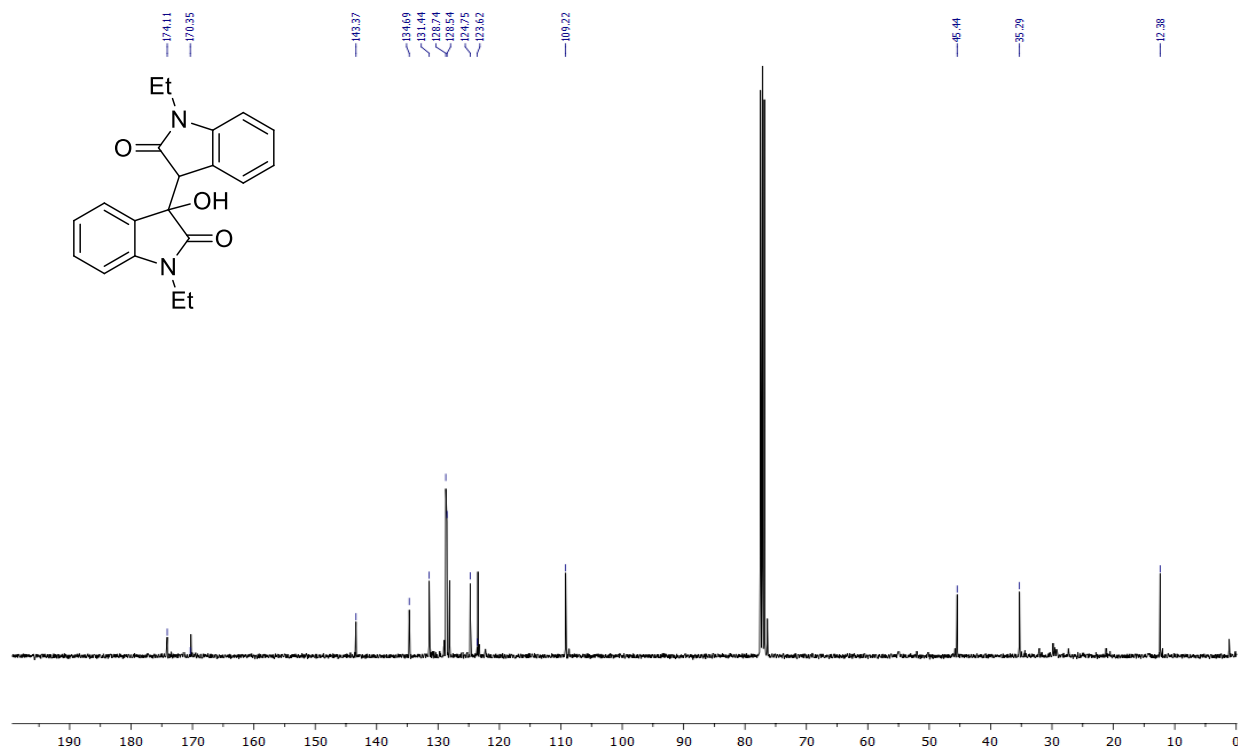

### $^1\text{H}$ NMR of crude reaction mixture at 24 h, pH 6 (Scheme 2)

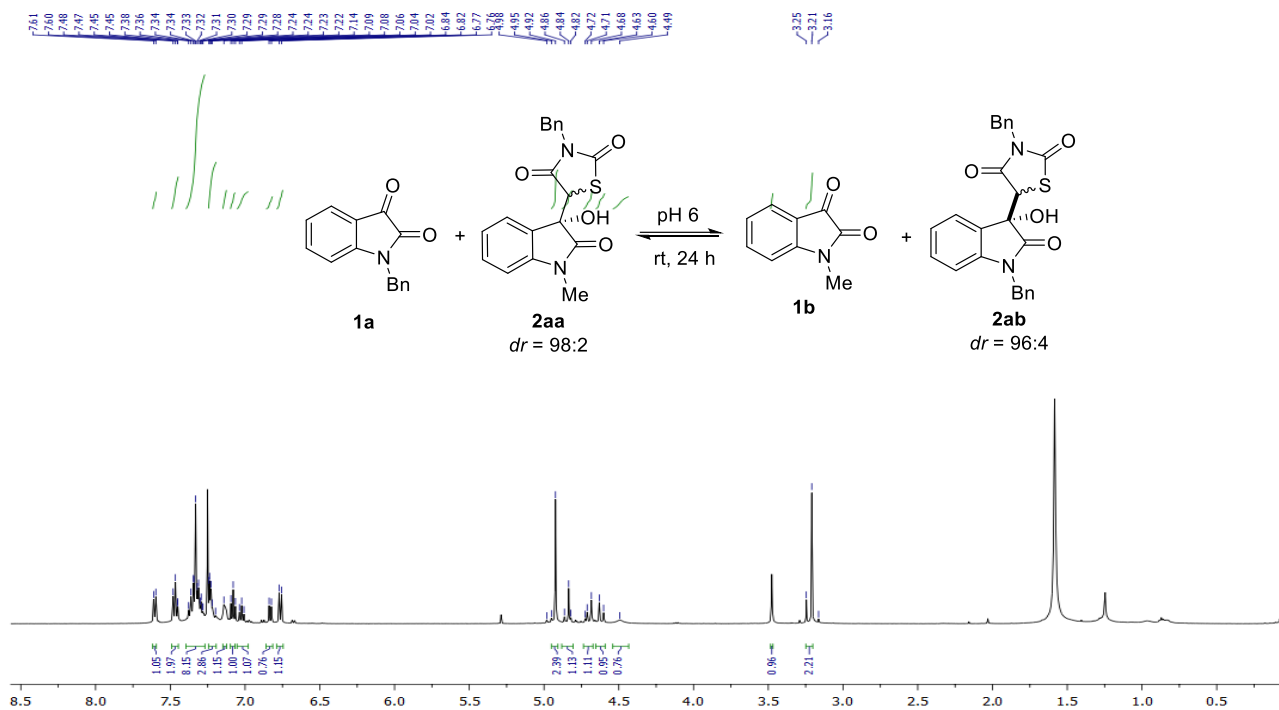

### Mass spectrum of crude reaction mixture at 24 h, pH 6 (Scheme 2)

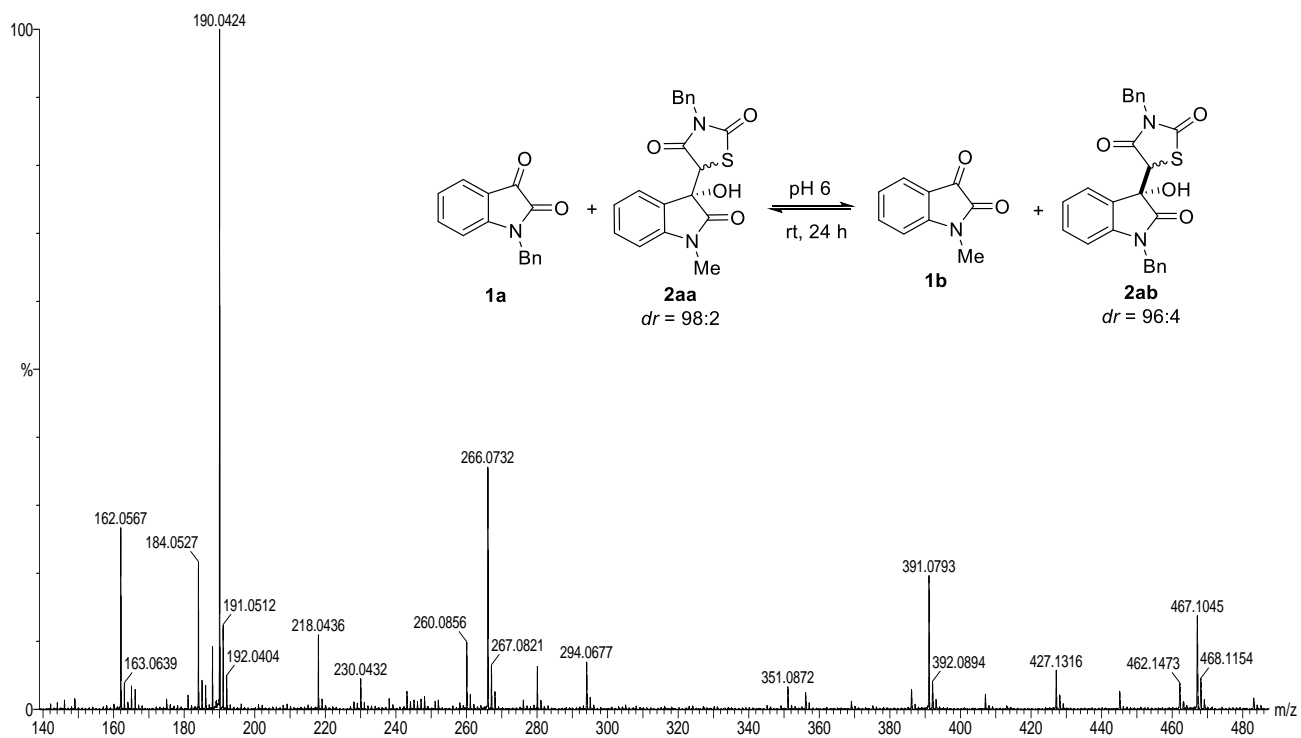

Supplement: d2ob01993k1.pdf [file d2ob01993k1.pdf]
